# Supplementary material
Source: bioRxiv or medRxiv preprint supplement (https://www.biorxiv.org/highwire/filestream/57174/field_highwire_adjunct_files/2/189076-3.pdf)

## Figure legend

These Manhattan plots illustrate results from evaluating the causal influence of DNA methylation on complex traits using genetic variants as instruments. All points correspond to p-values derived from the Mendelian randomization analysis as described in the manuscript. Points which are highlighted mean that these effects provided evidence that the same underlying genetic variation was observed to influence both methylation and trait at this locus using the joint likelihood mapping method. Plots are coloured depending on the subcategory that the analysed traits has been allocated to, as there is more likely to be shared loci across traits within the same category. P-values have been capped at  $1 \times 10^{-50}$  to ensure plots remain legible.

# Aging

Age at menarche

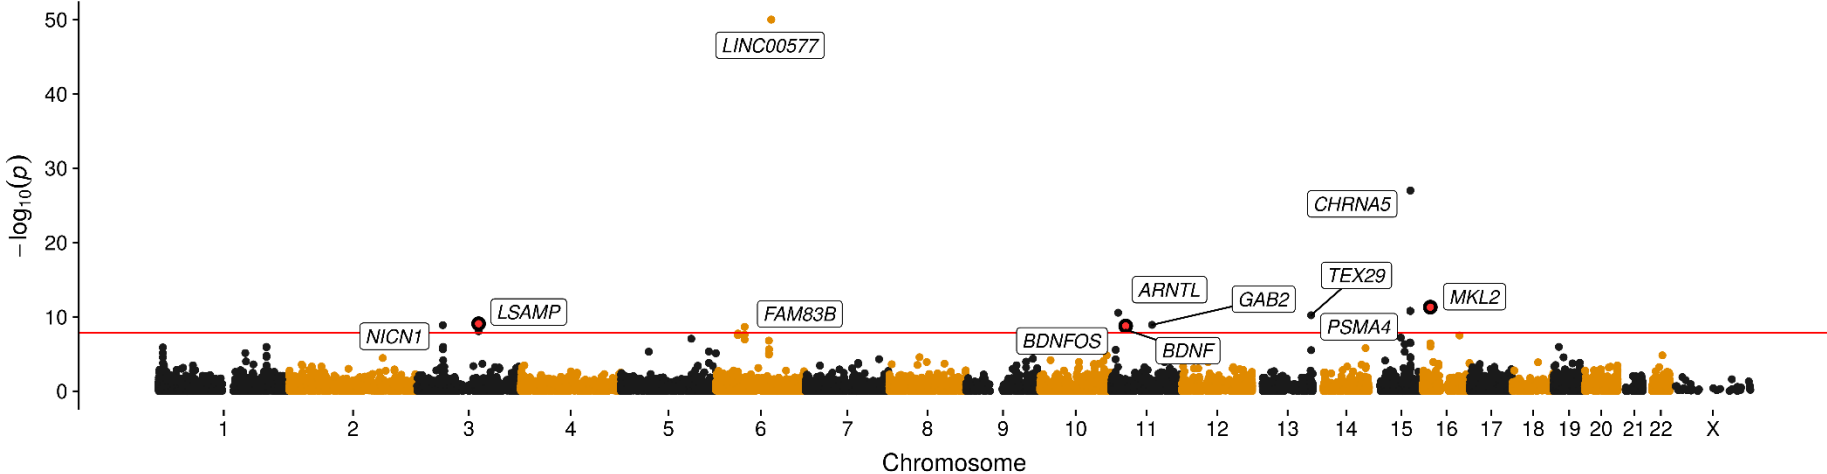

# Age at menopause

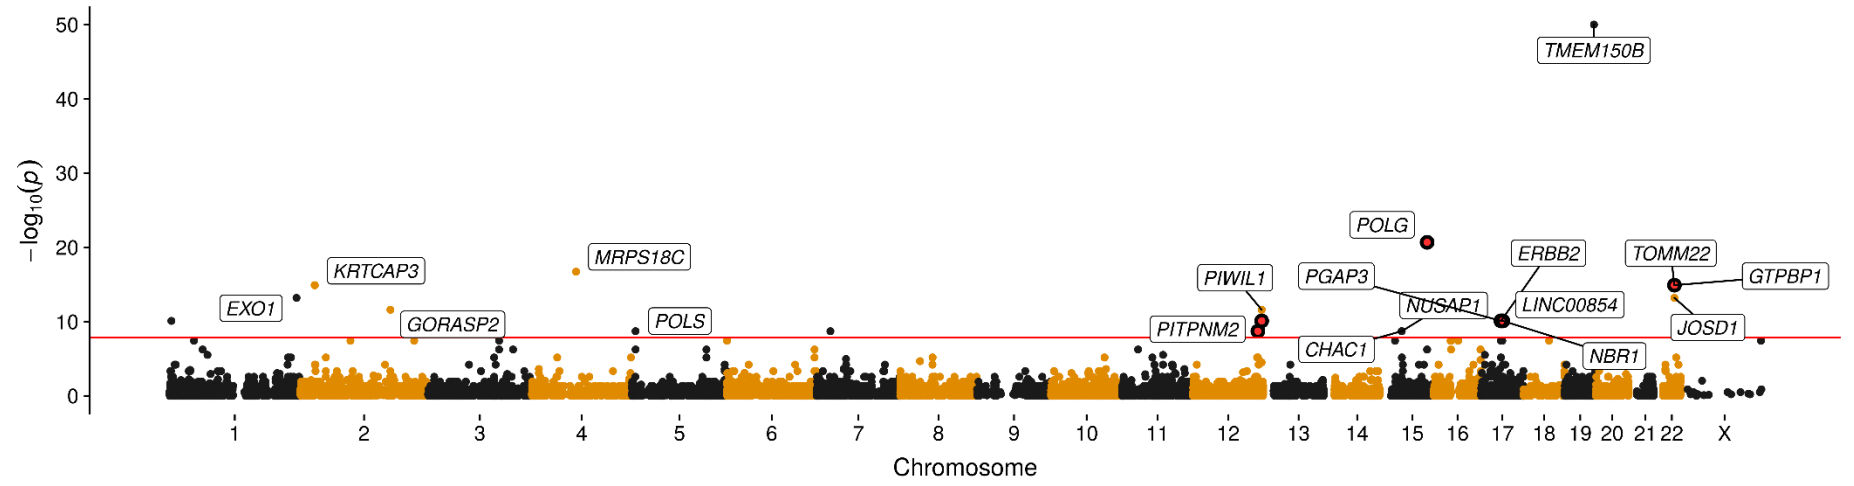

# Anthropometric

## Birth weight

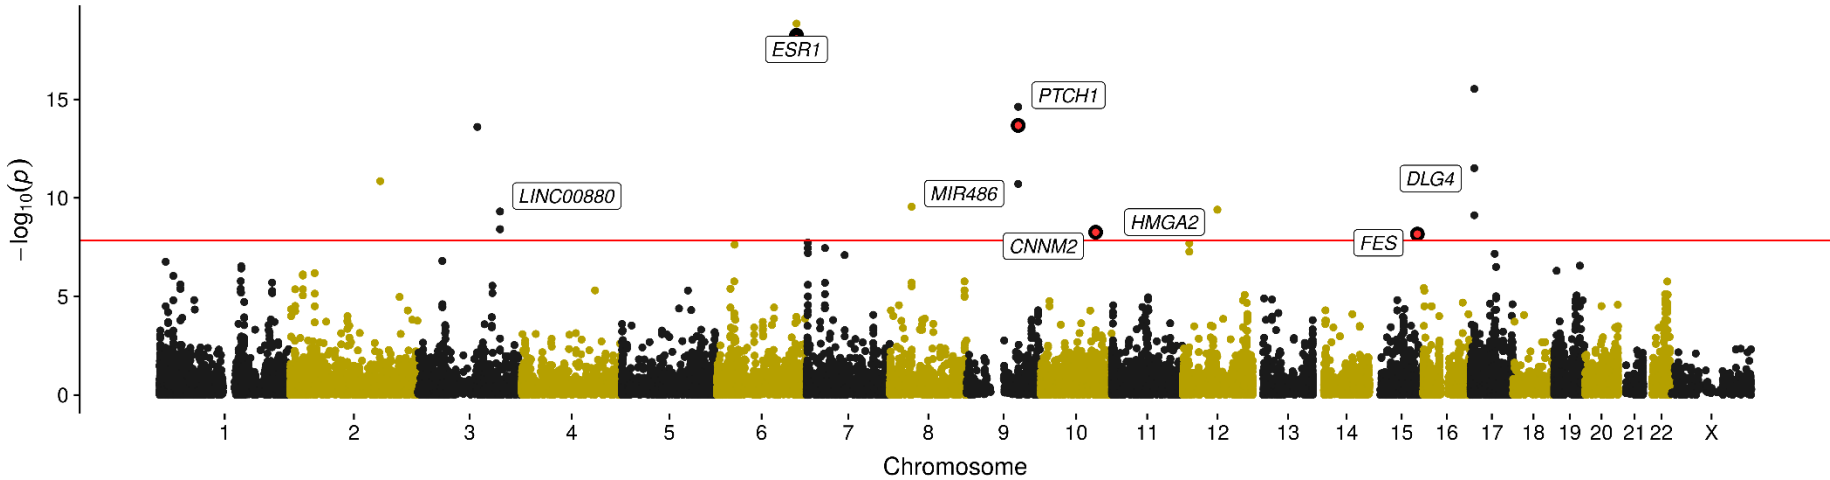

# Body mass Index

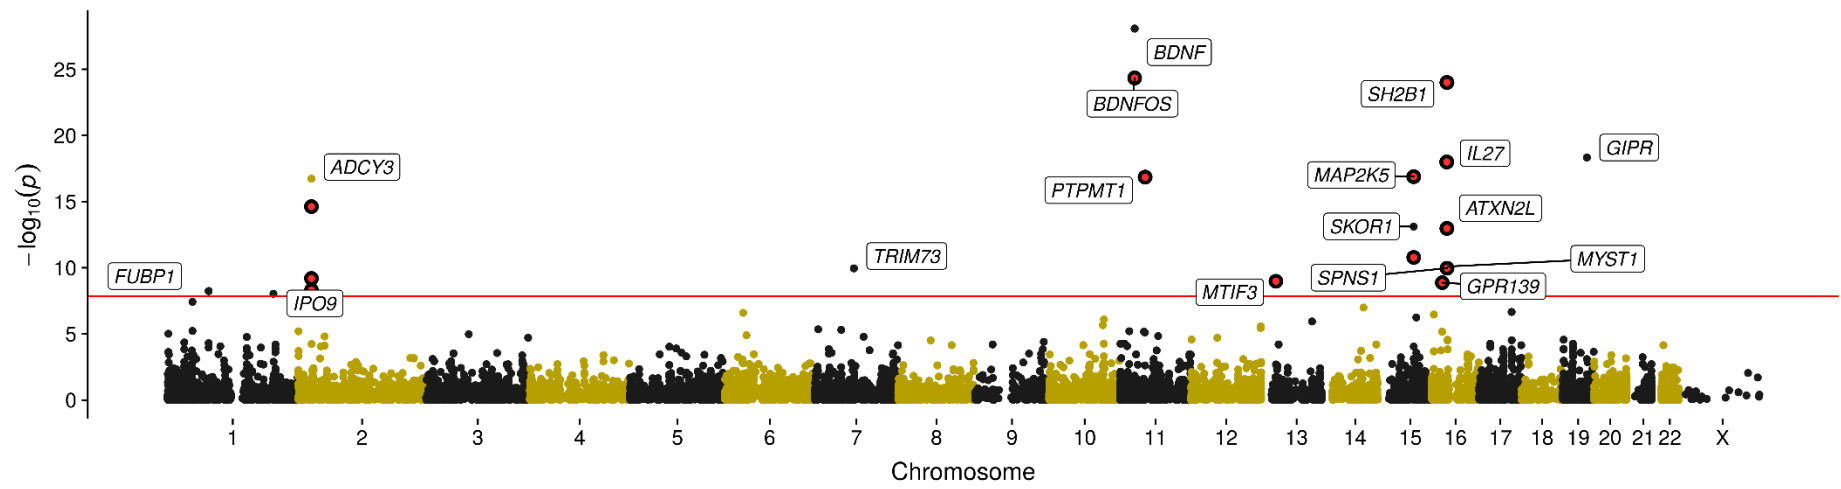

# Childhood obesity

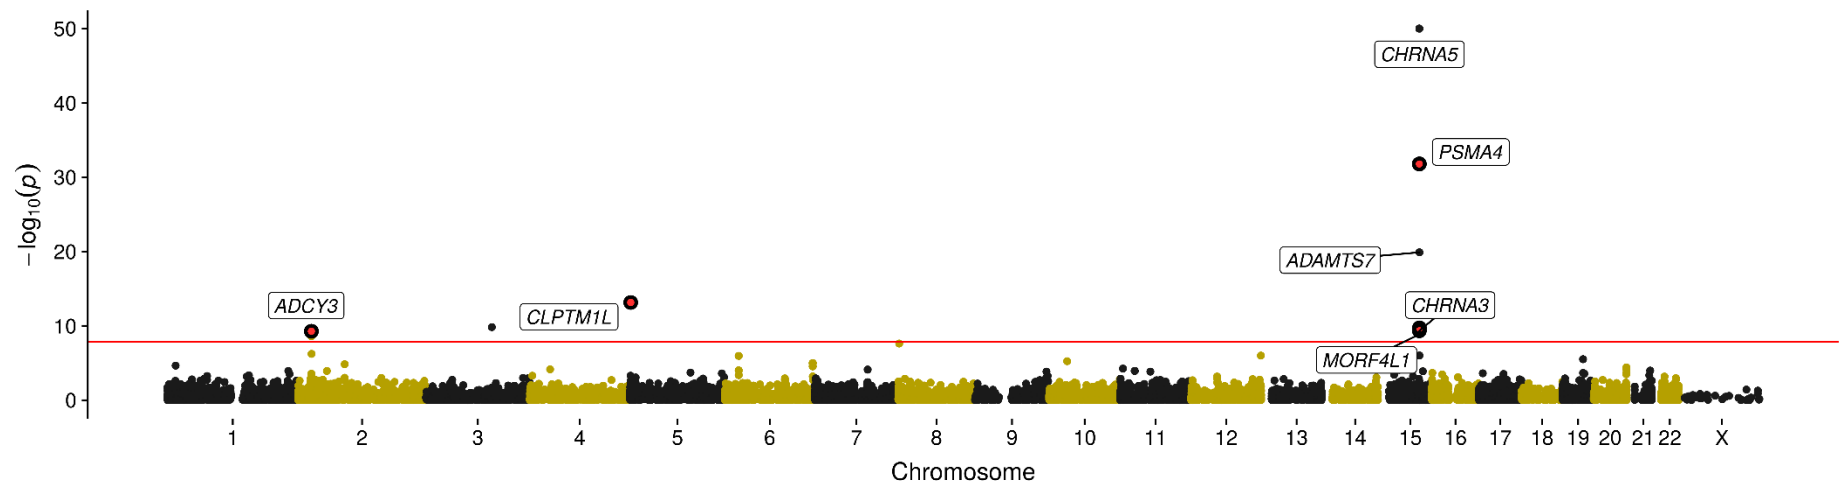

# Extreme height

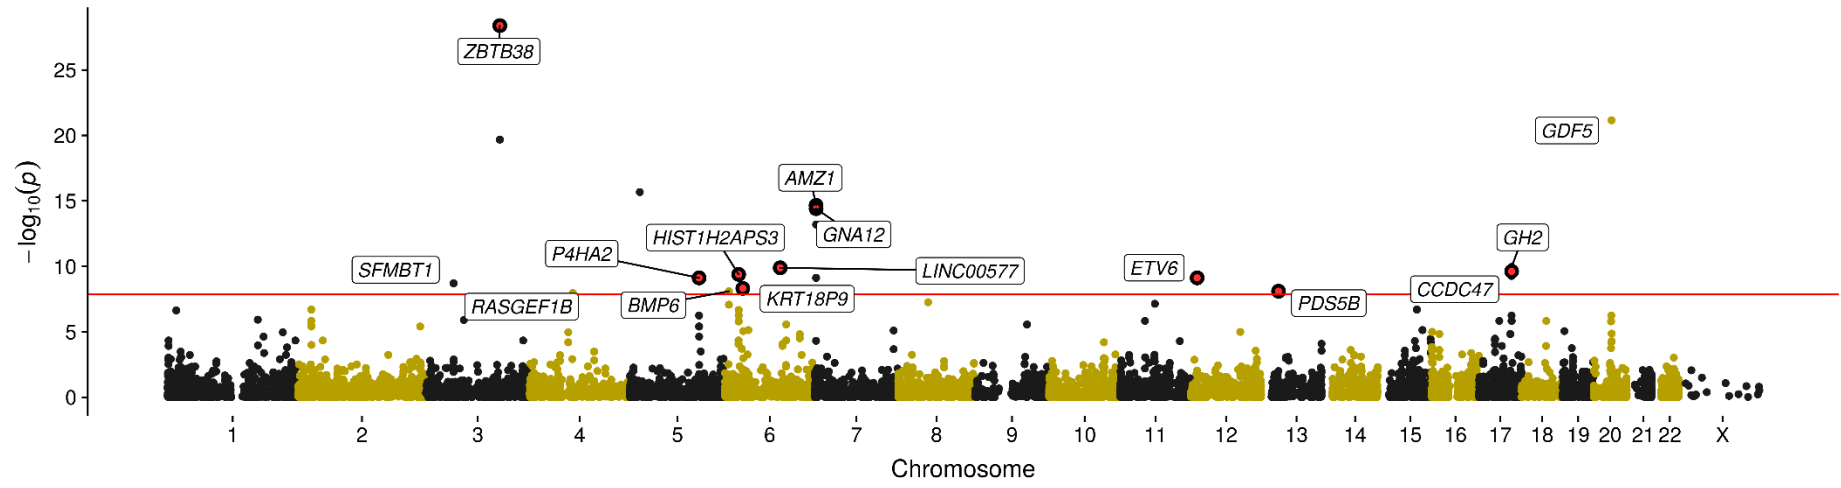

Height

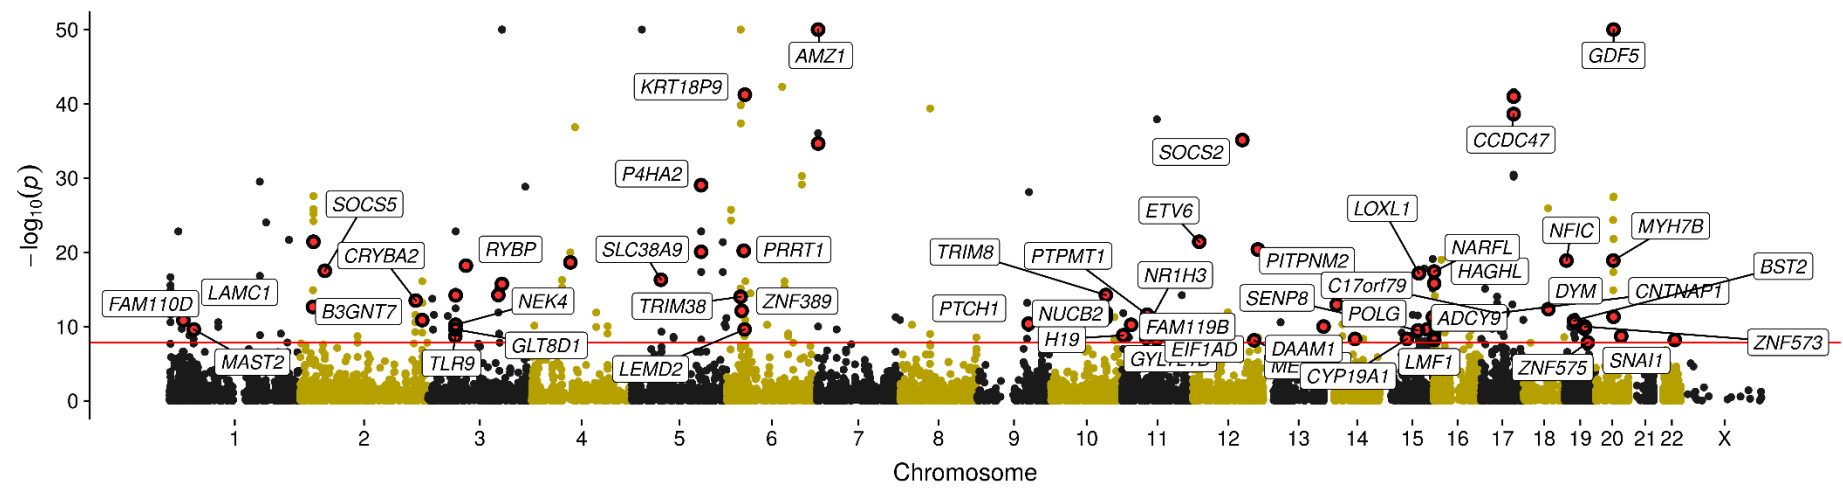



# Hip circumference

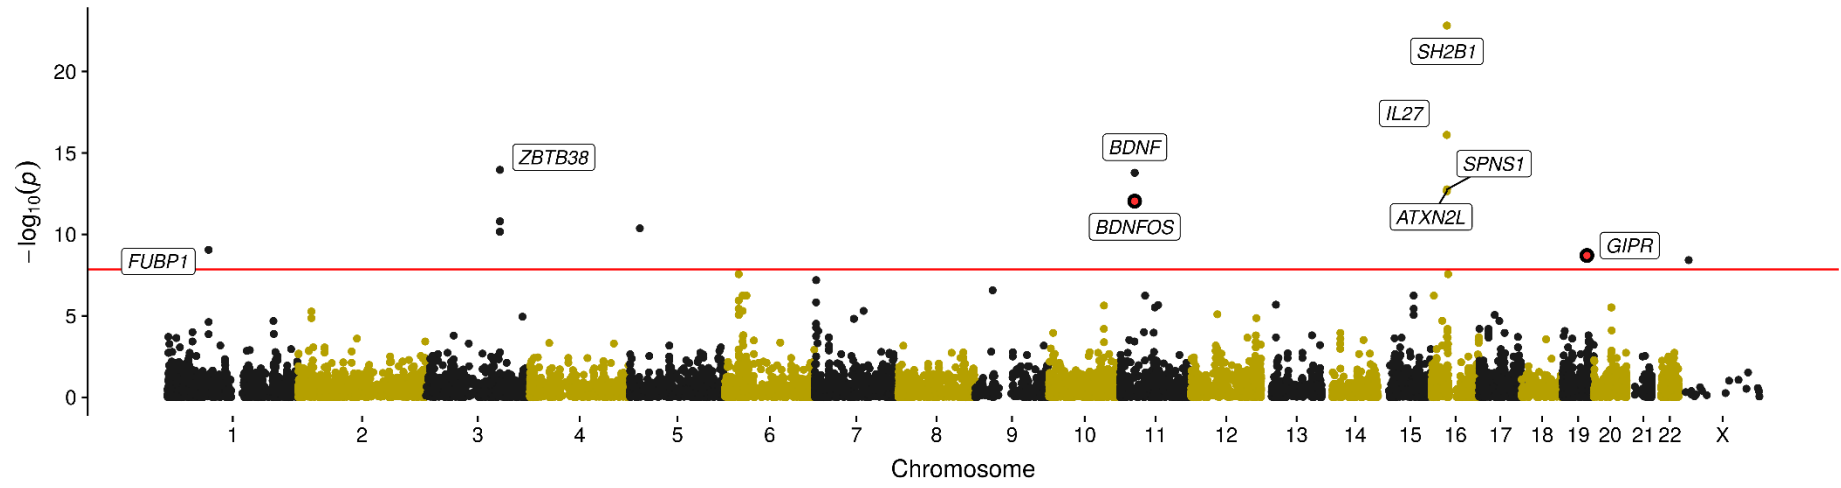

# Obesity

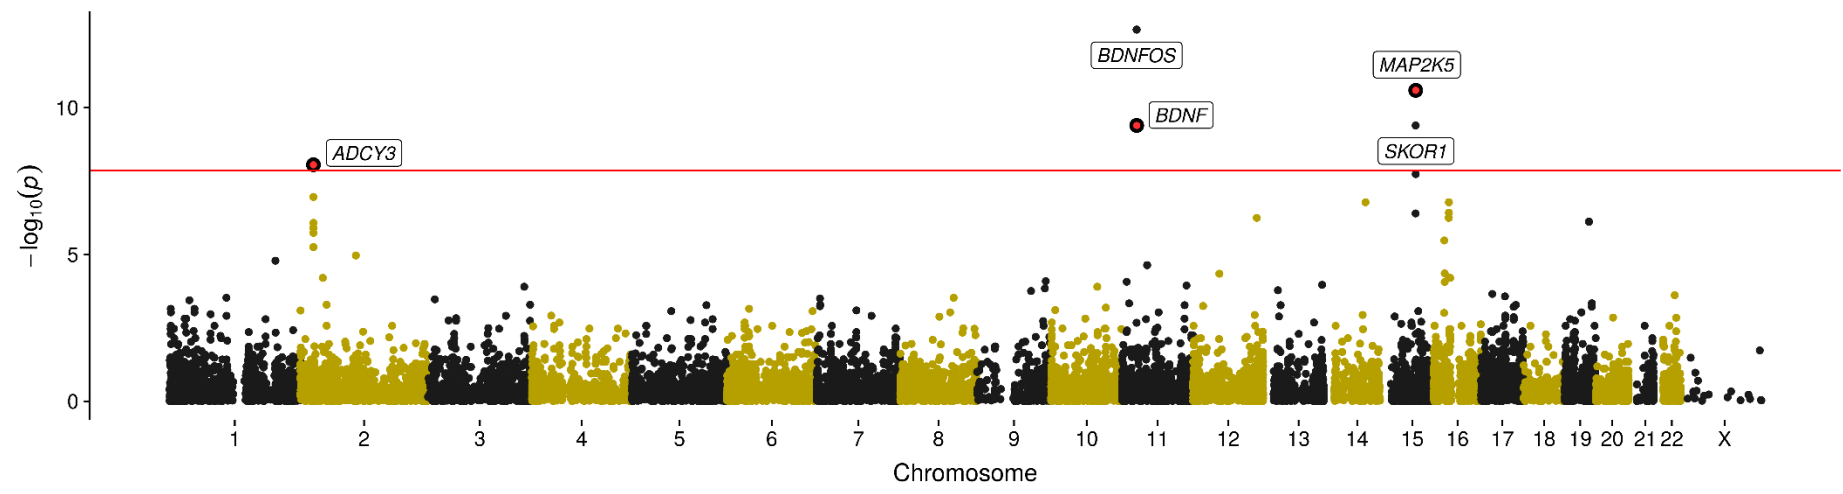

# Overweight

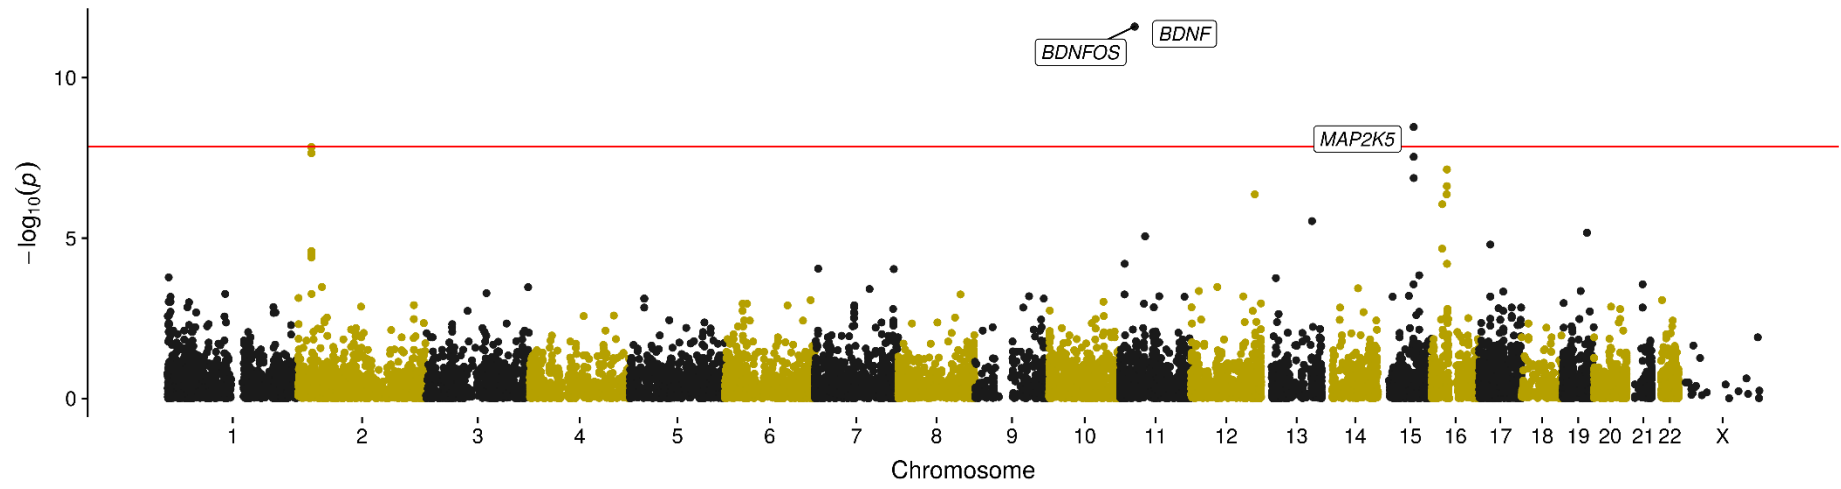

Sitting height ratio

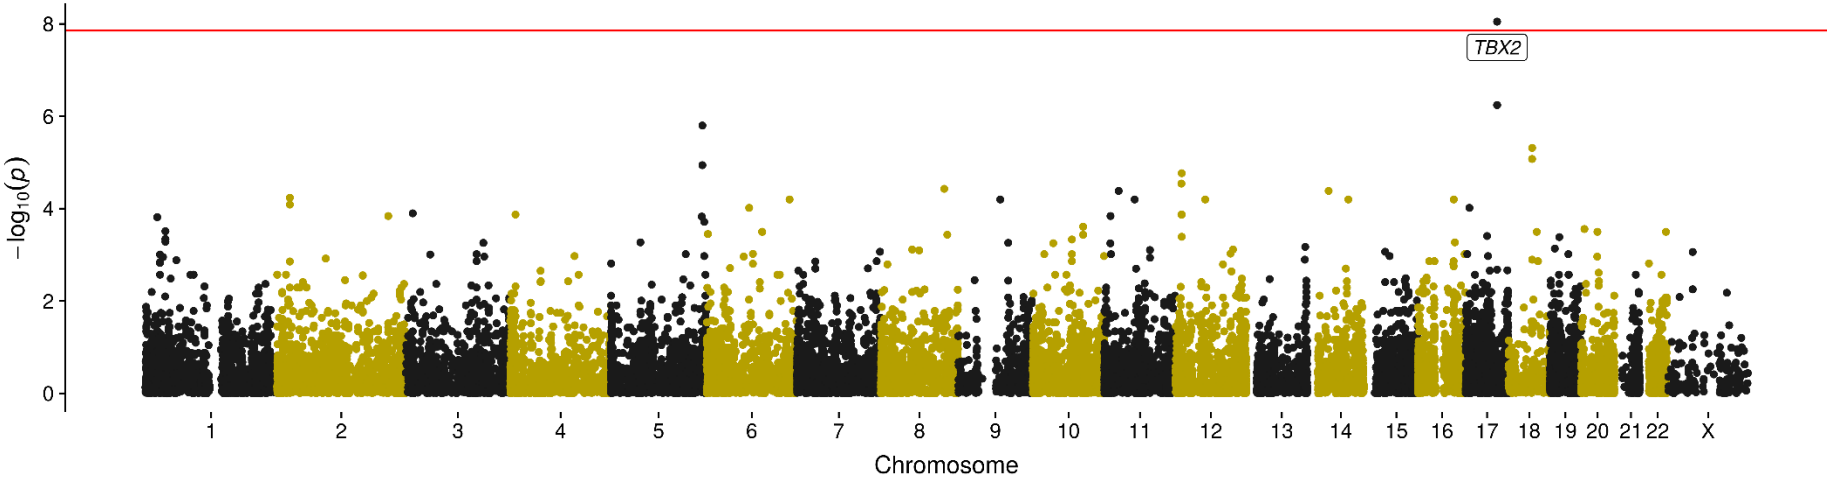

# Waist-to-hip ratio

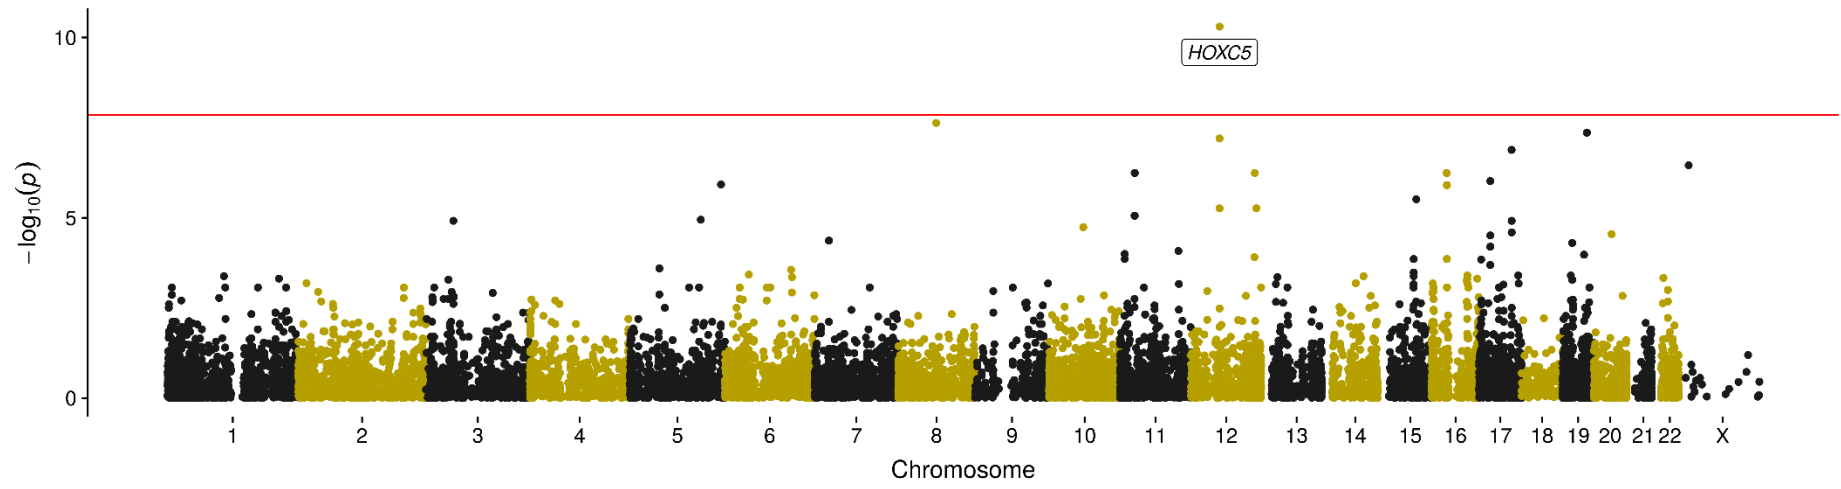

# Waist circumference

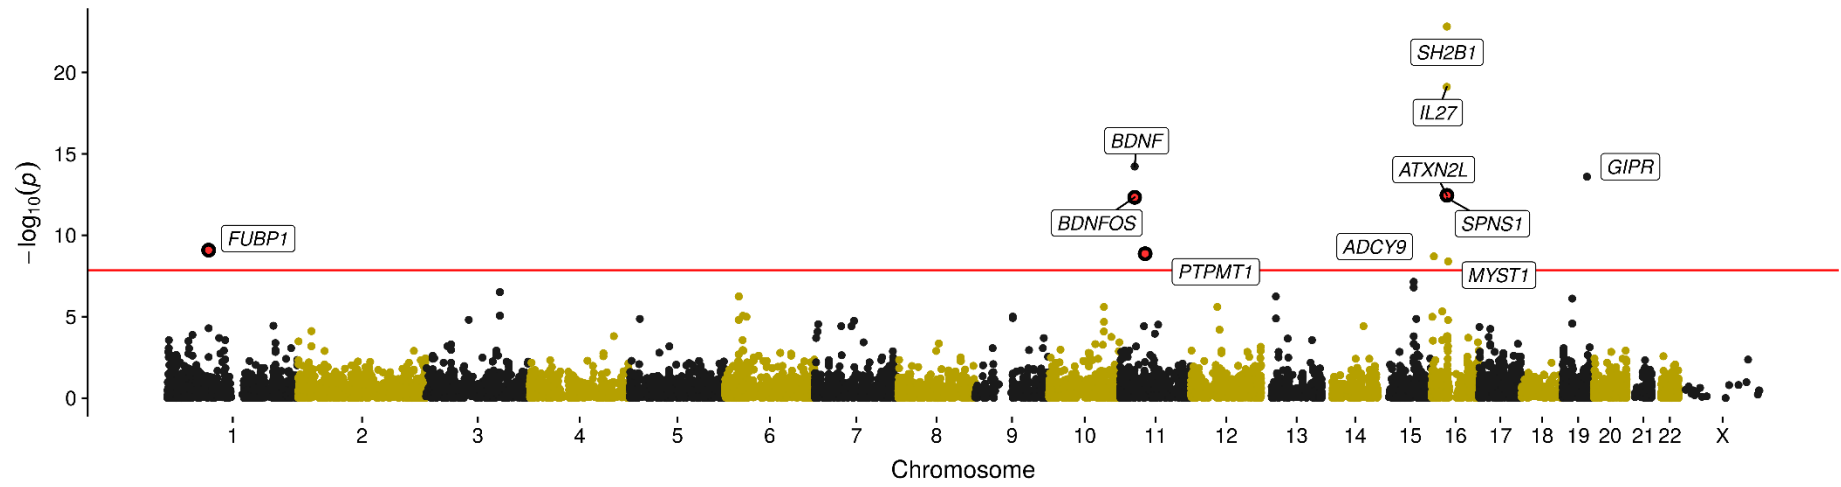

Weight

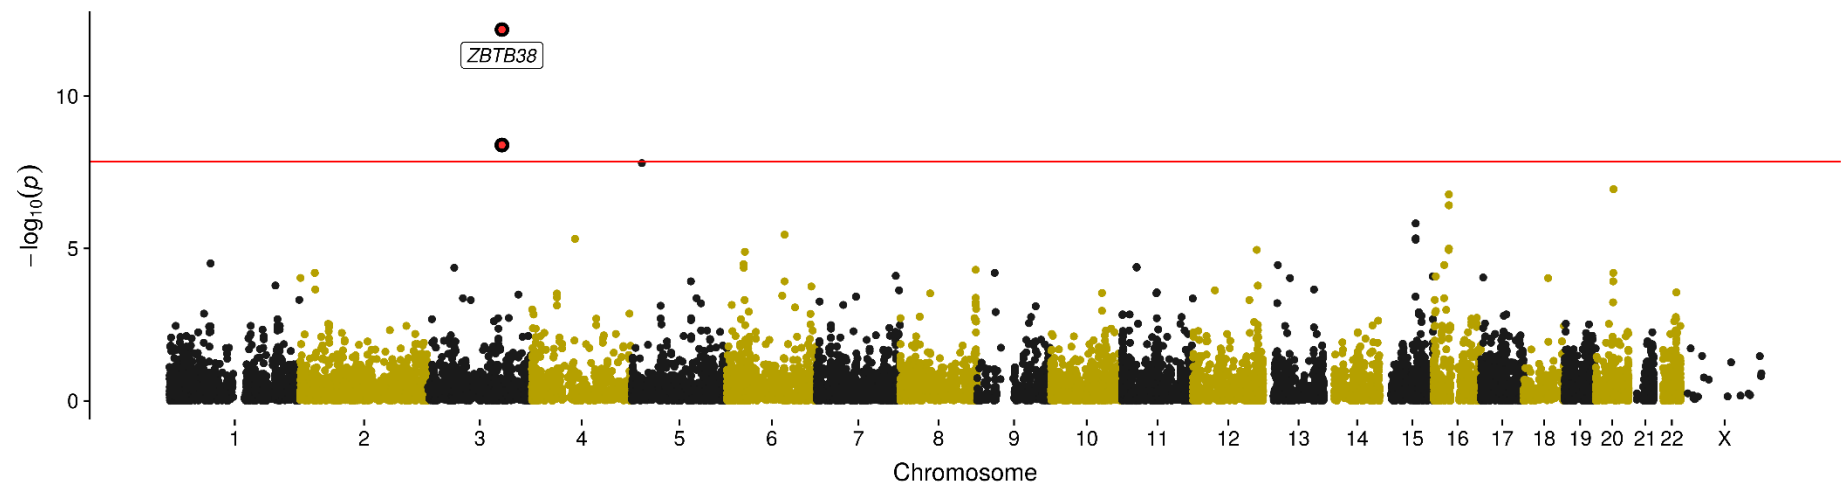

Autoimmune / inflammatory

Asthma

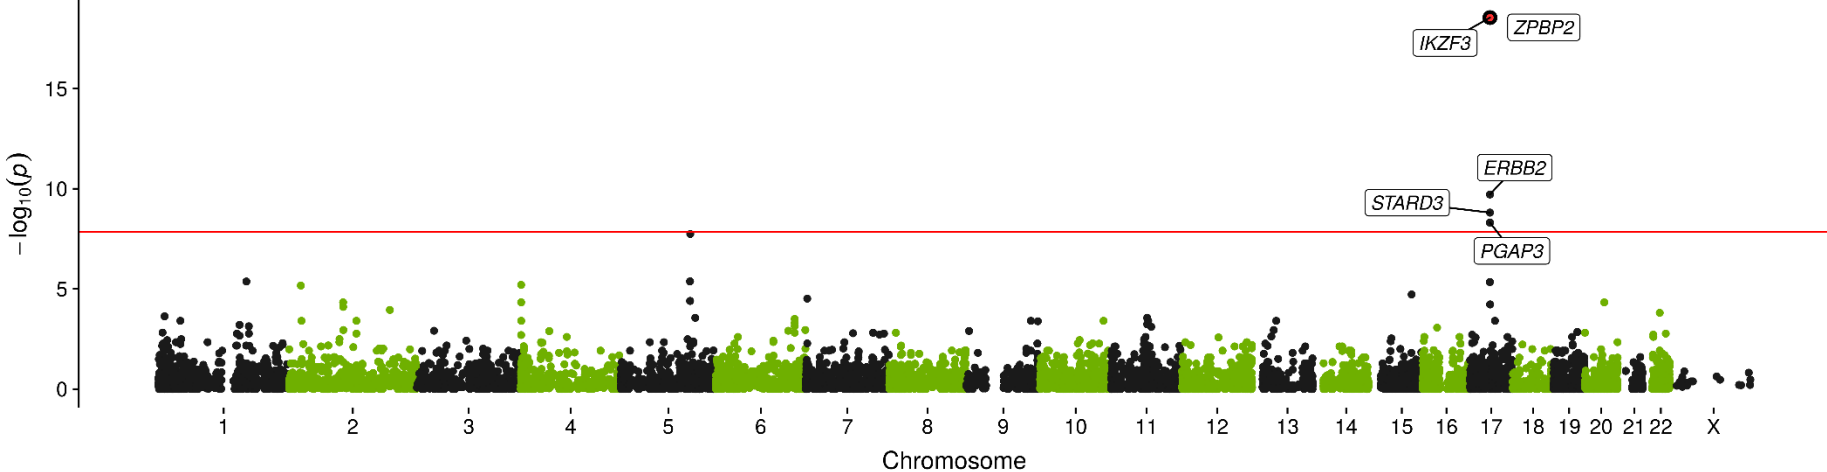



# Celiac disease

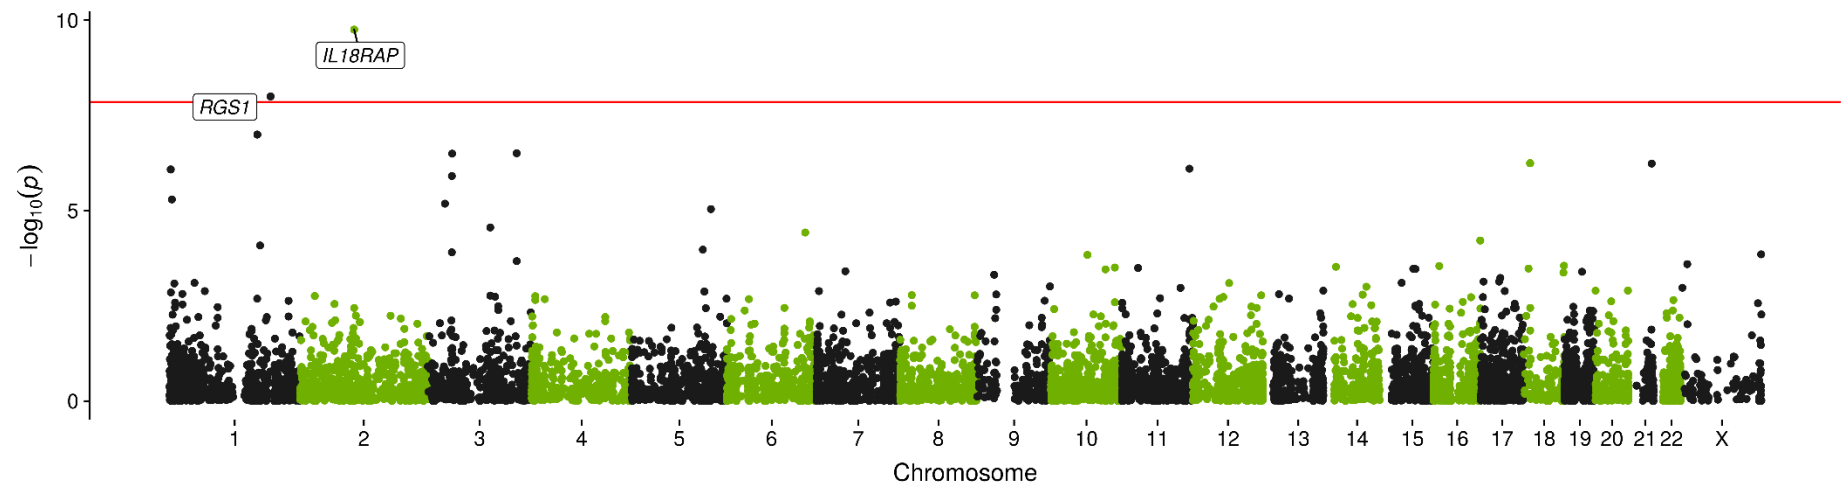

# Crohn's disease

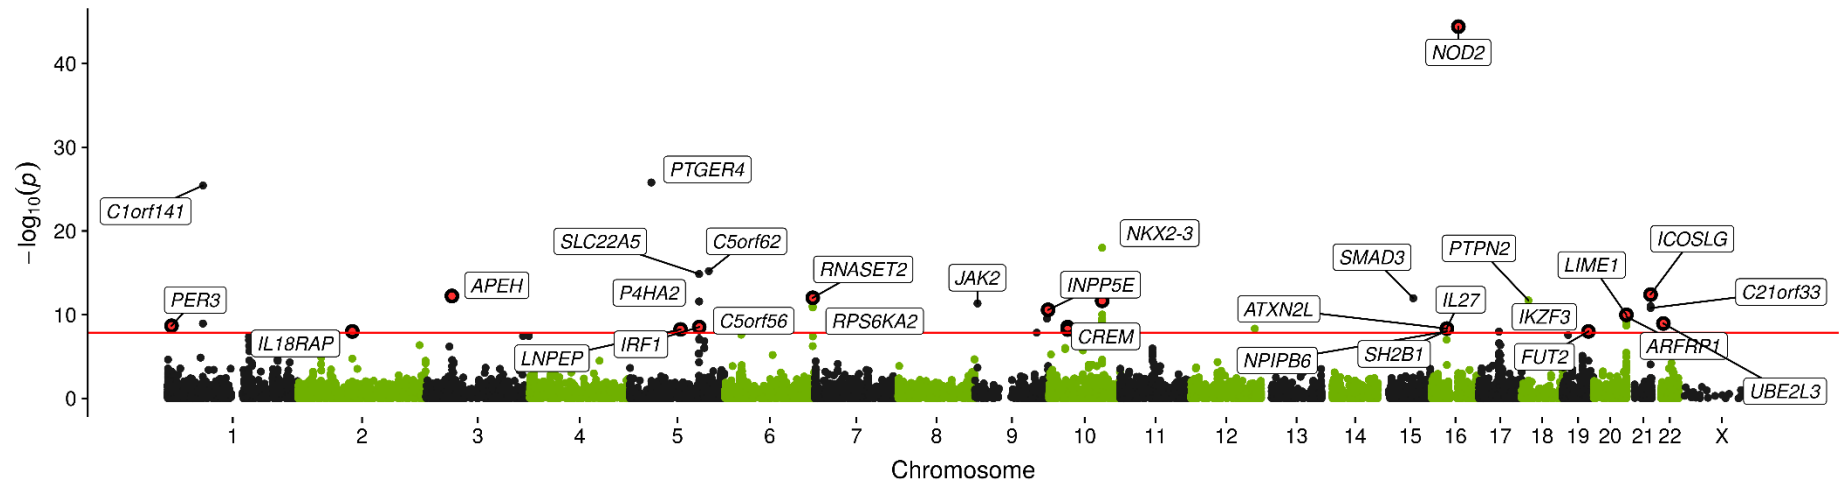

# Eczema

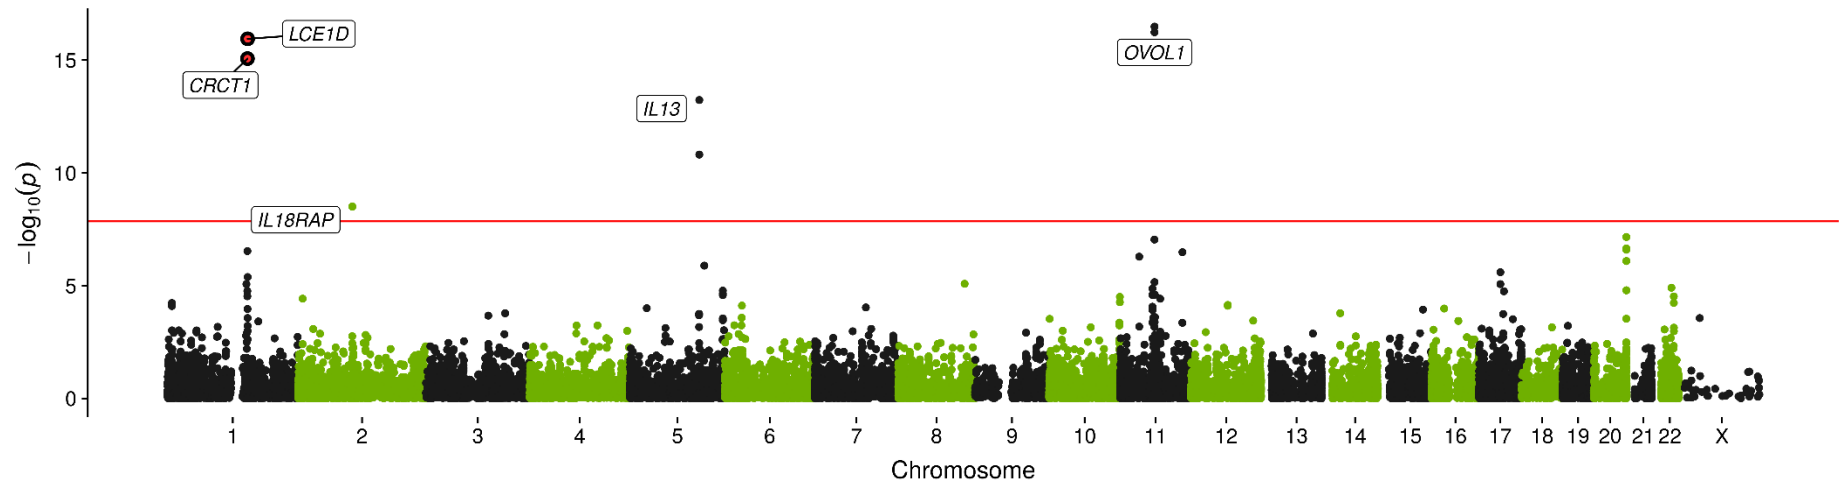

# Inflammatory bowel disease

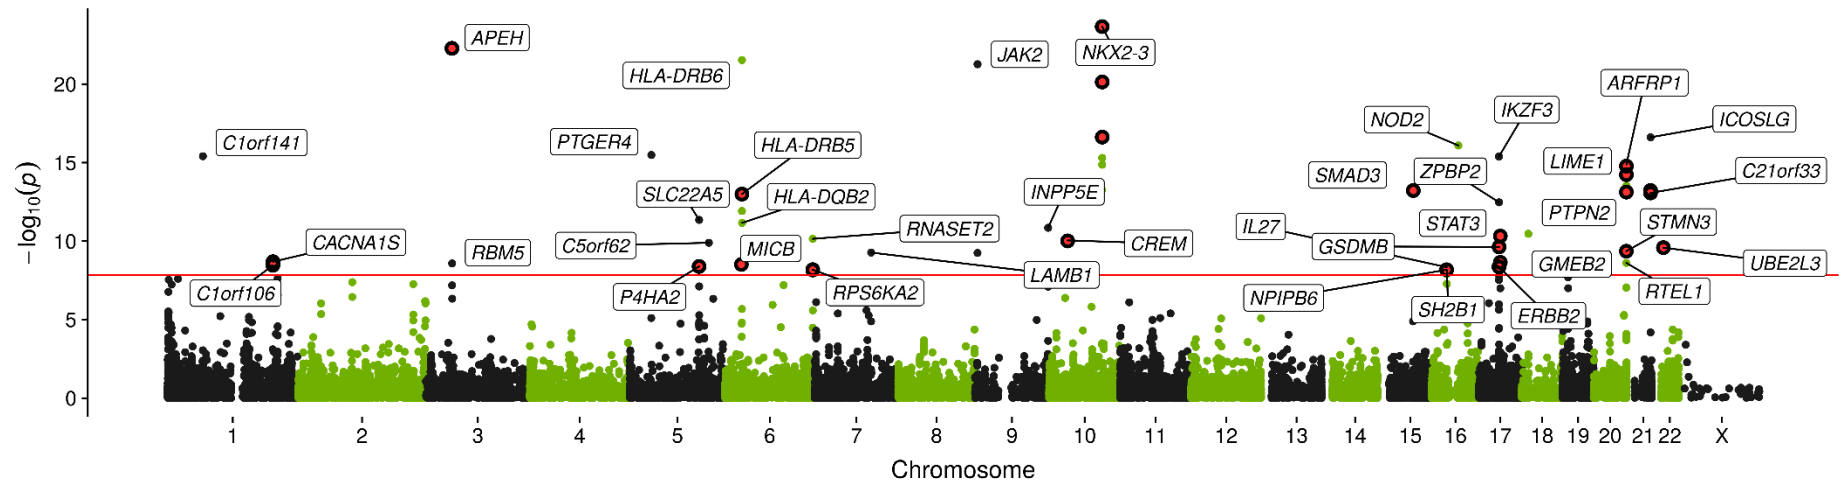

# Multiple sclerosis

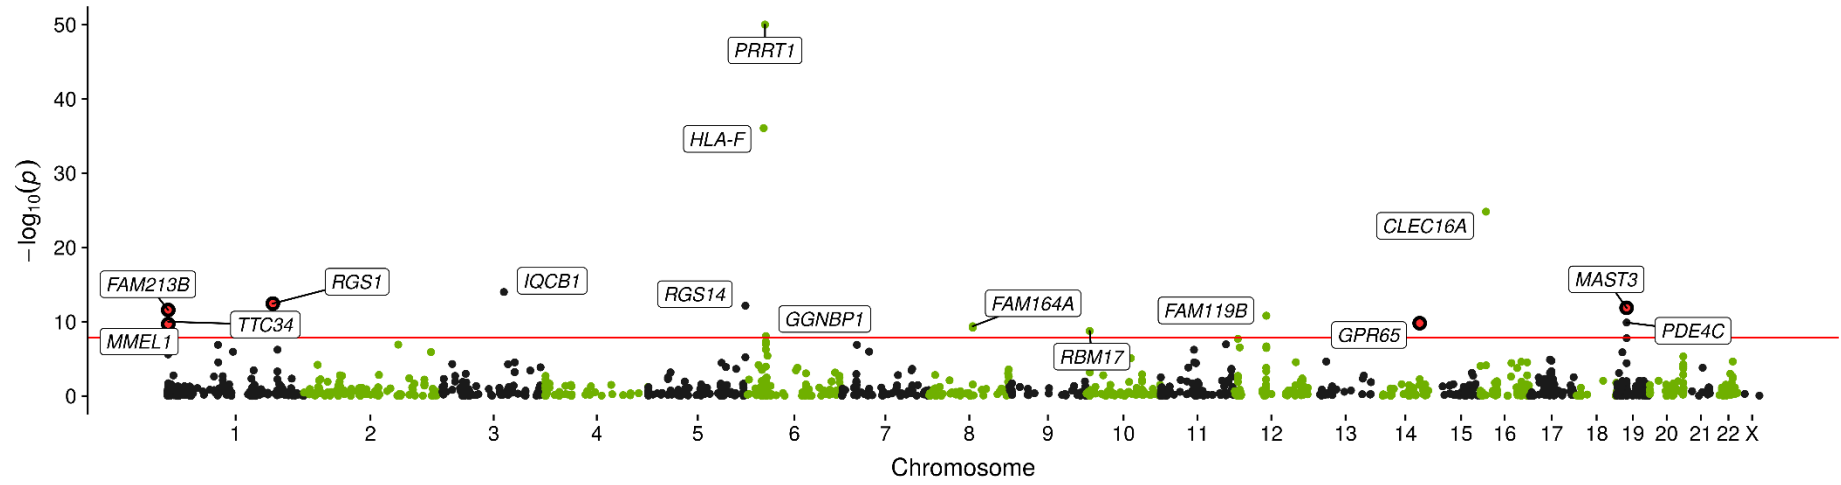

# Rheumatoid arthritis

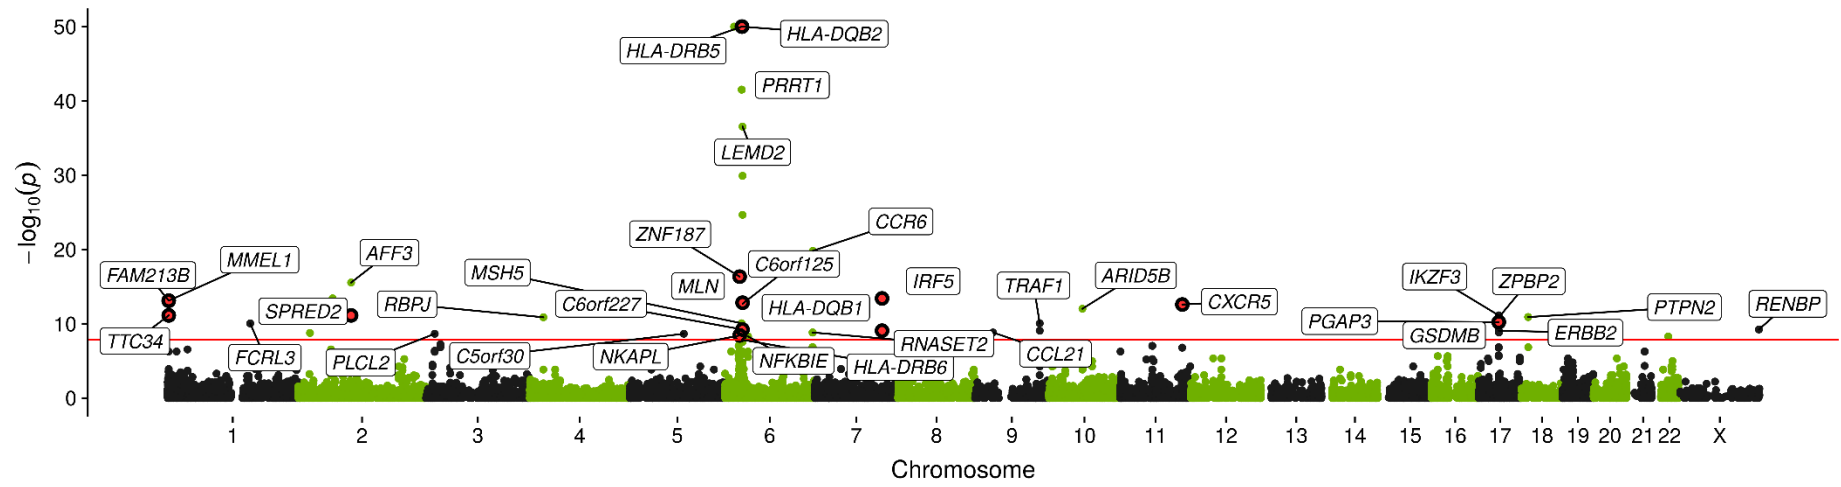

# Ulcerative colitis

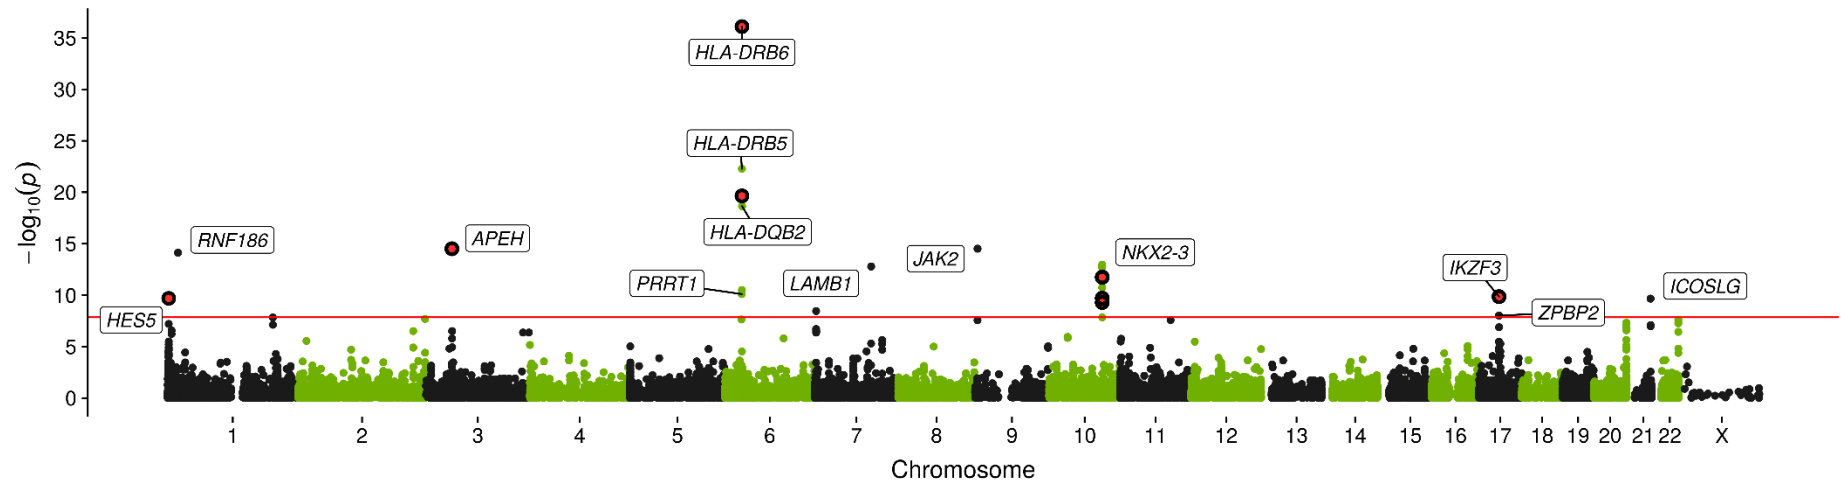

# Education

Years of Schooling

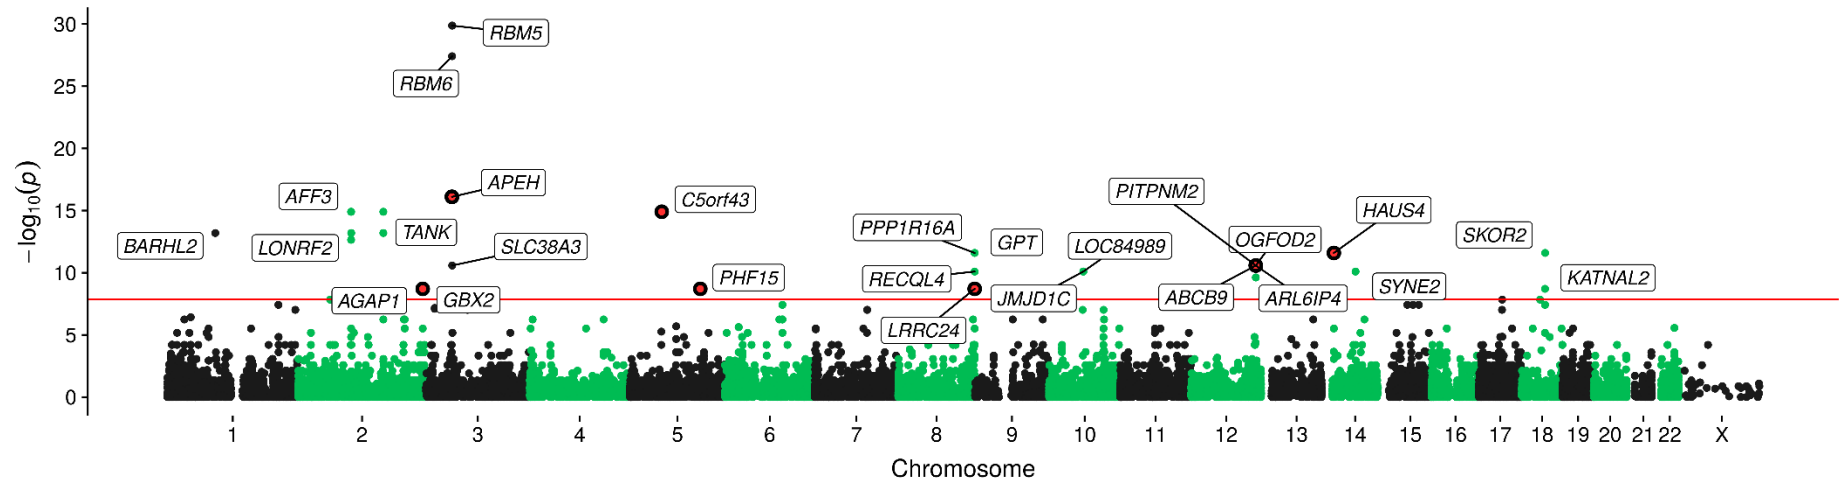



# Cardiovascular

## Adiponectin

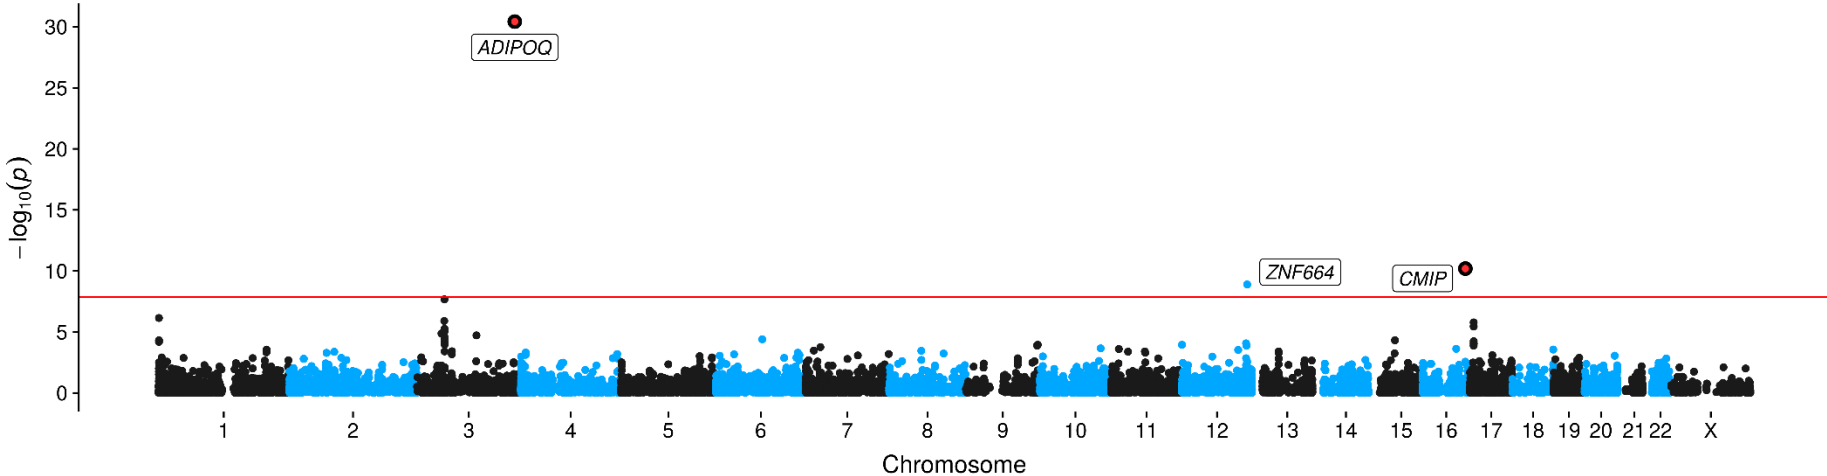

# Coronary heart disease

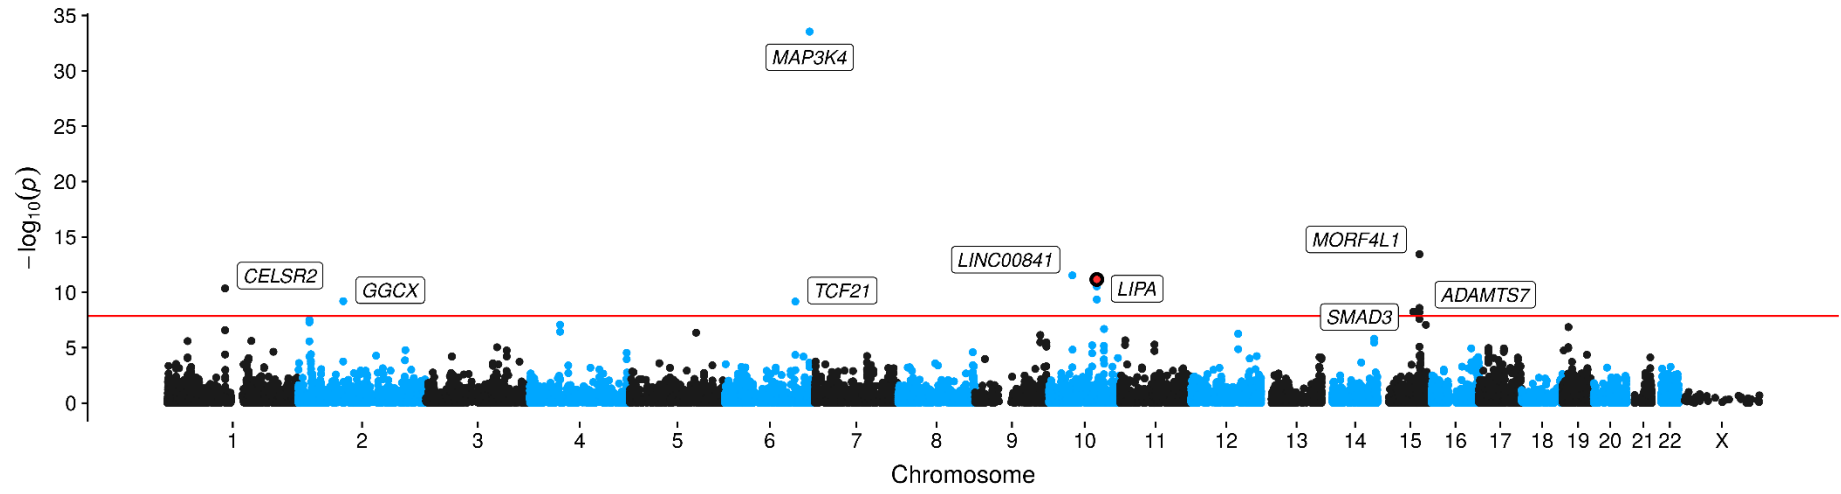

# HDL Cholesterol

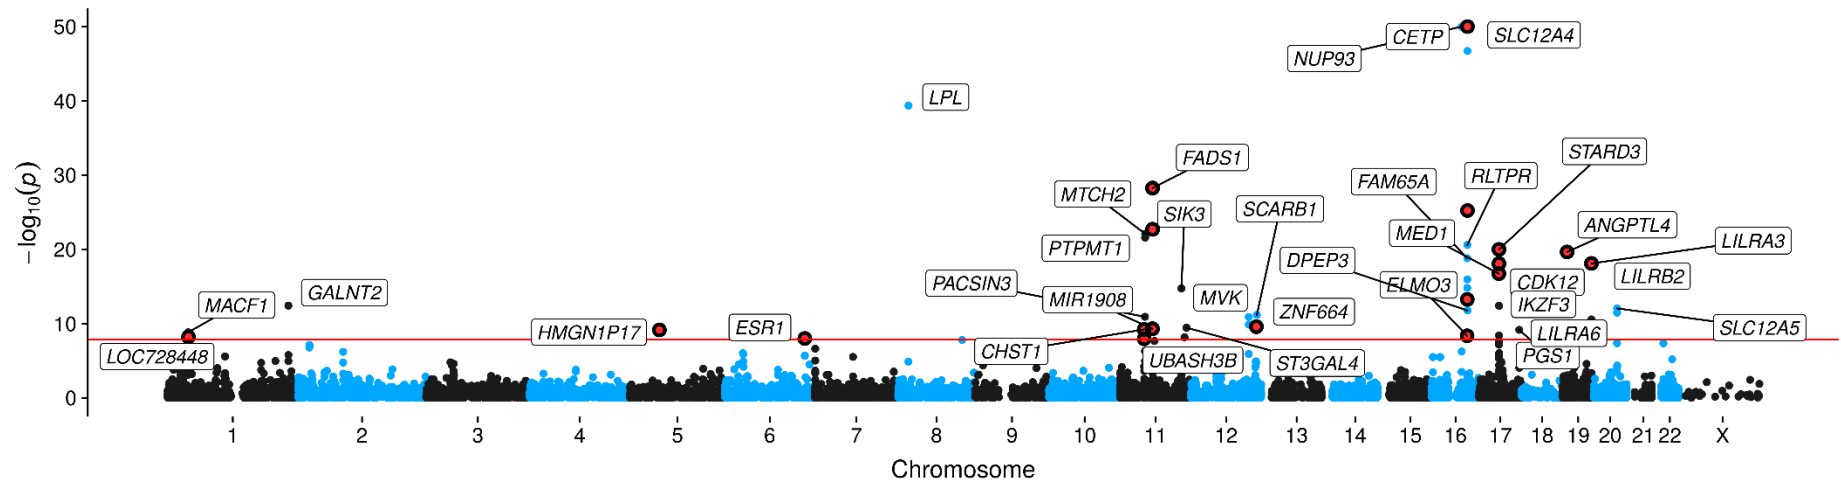

# Heart rate

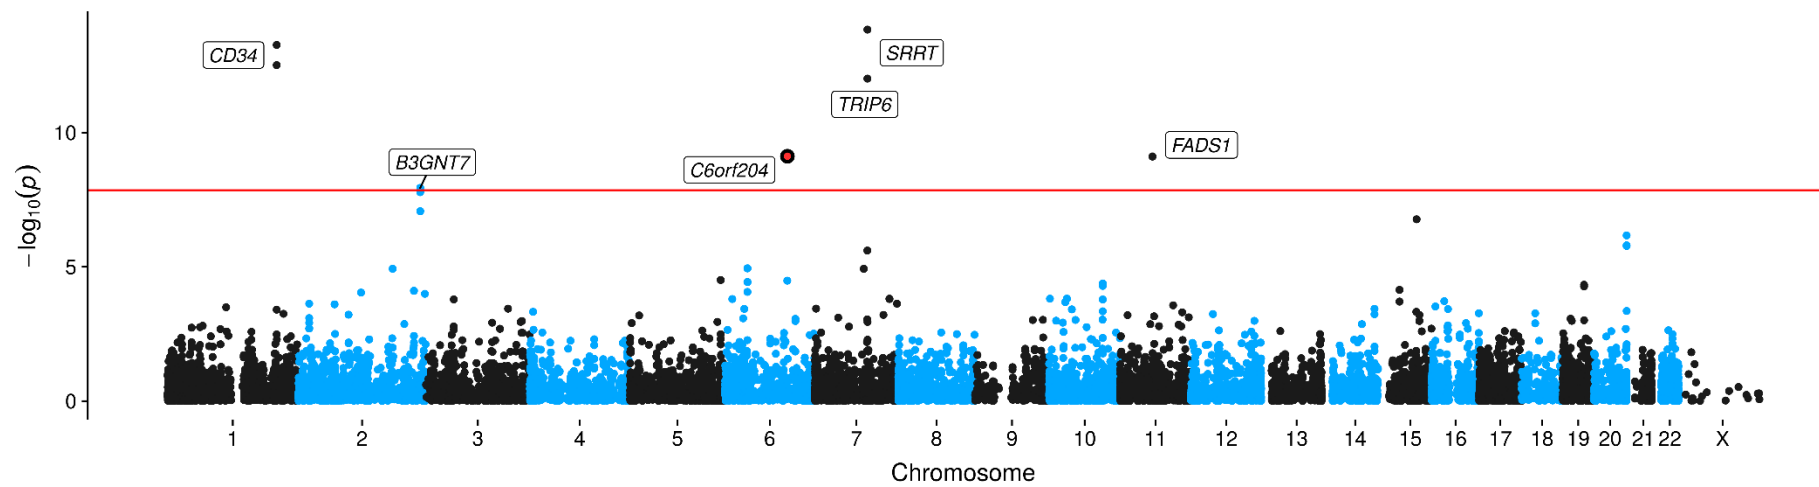

# LDL Cholesterol

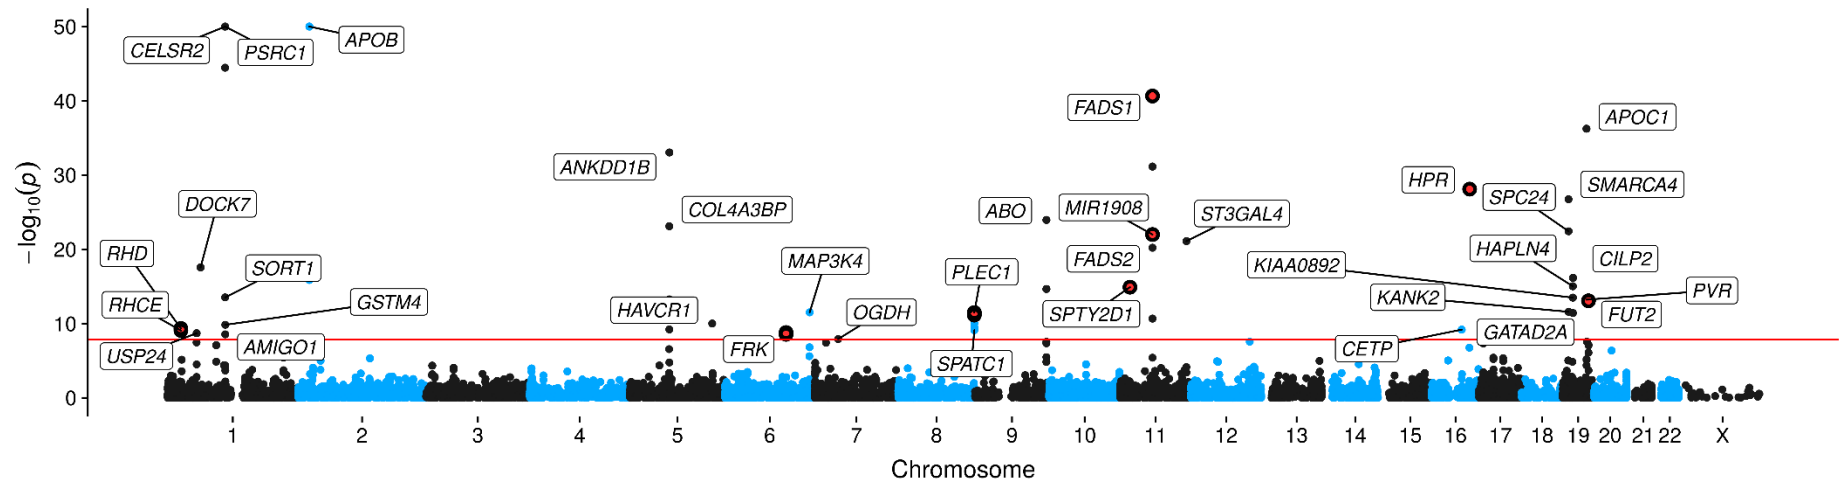

# Myocardial Infarction

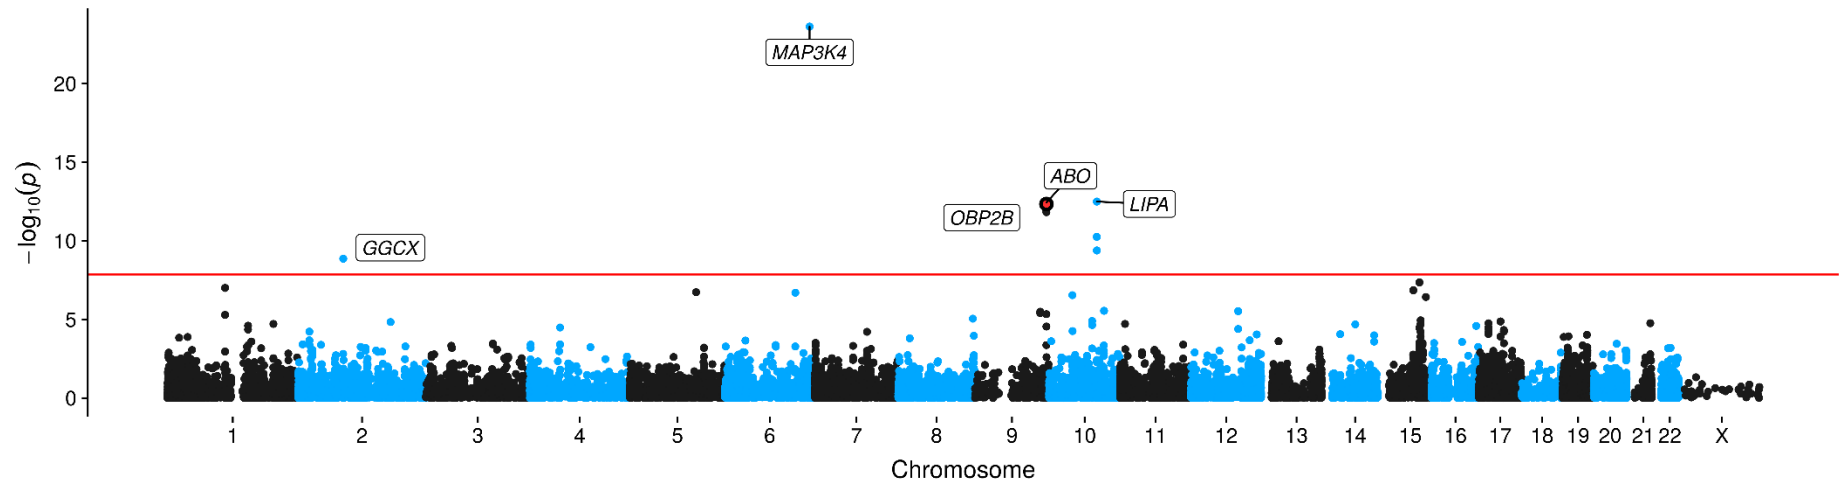



# Triglycerides

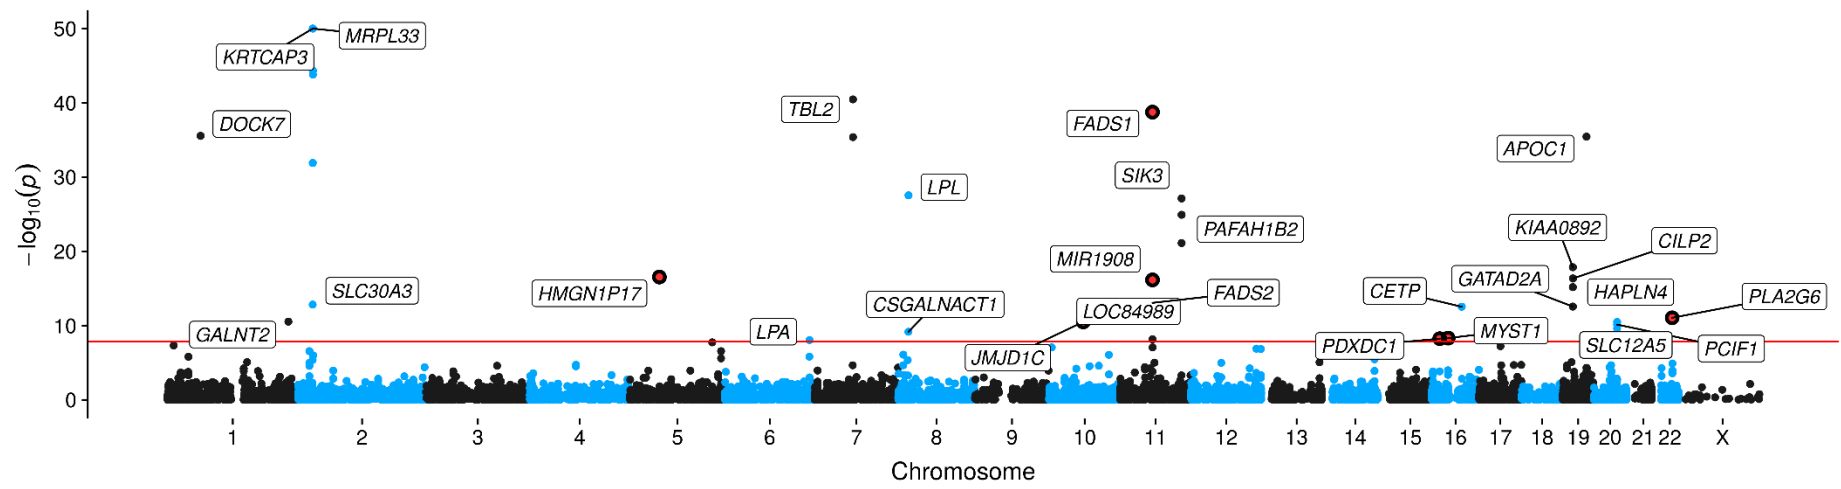



# Glycemic

Fasting proinsulin

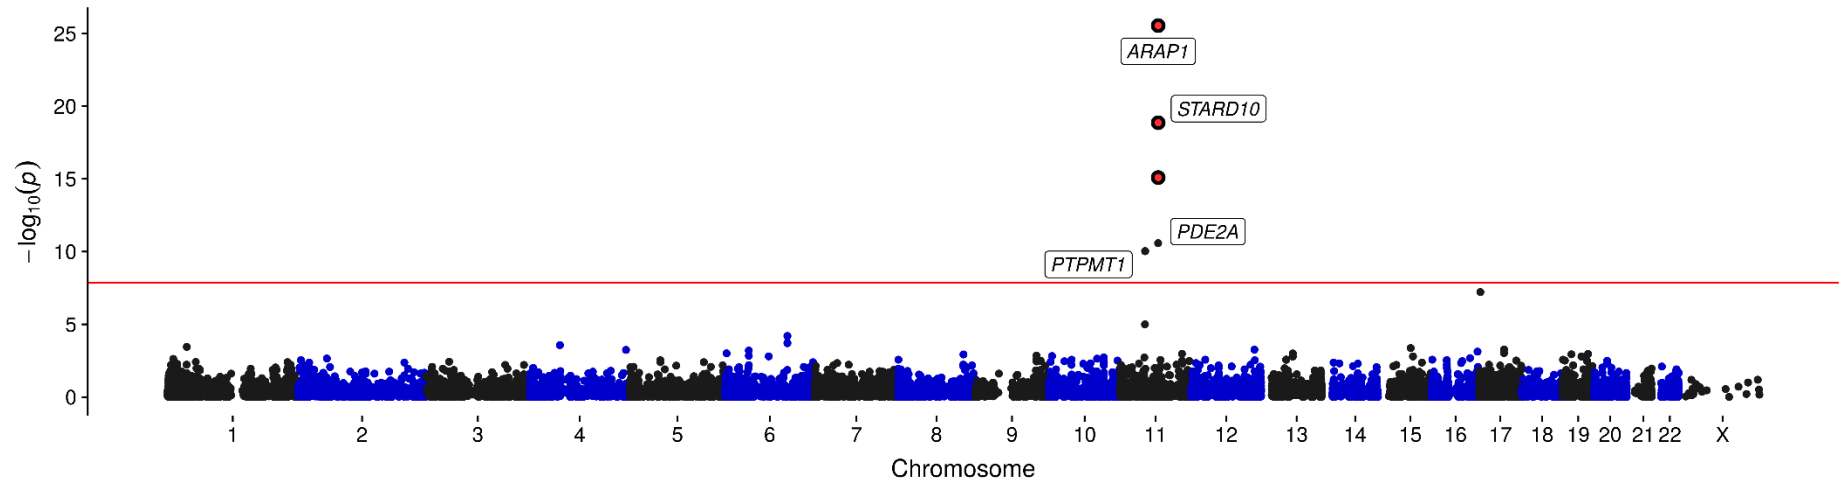

HOMA-B

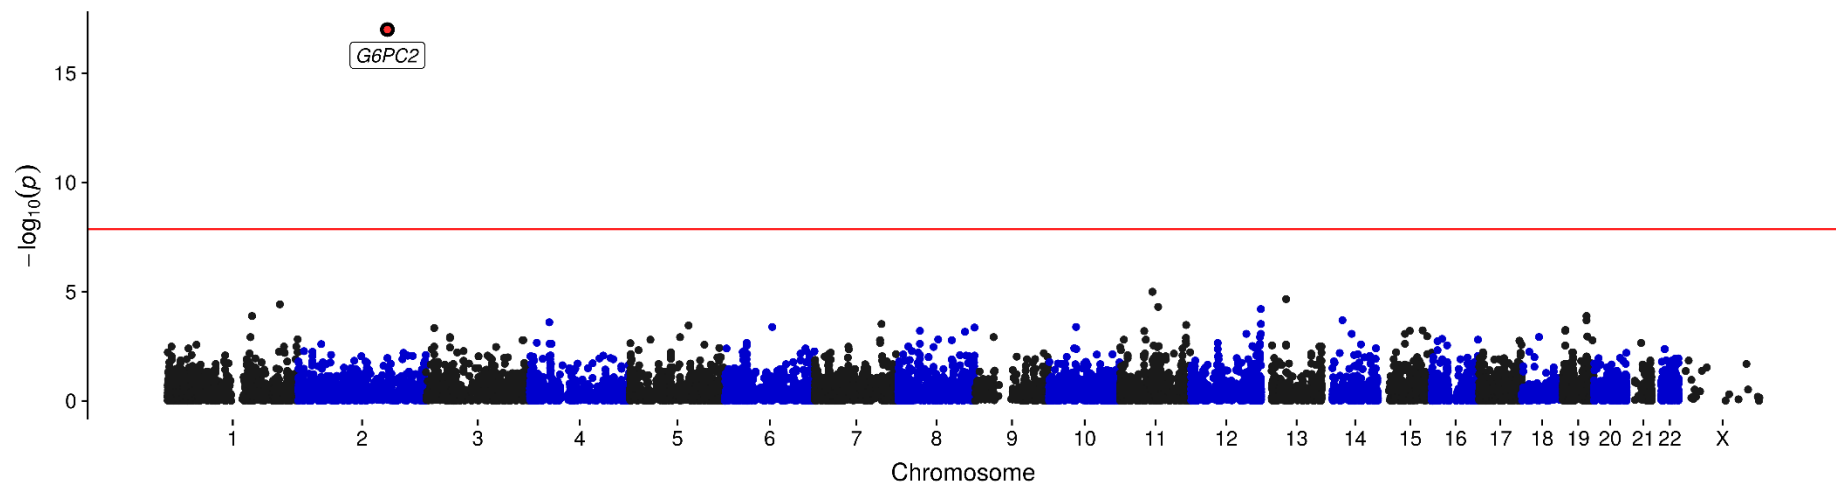

HbA1C

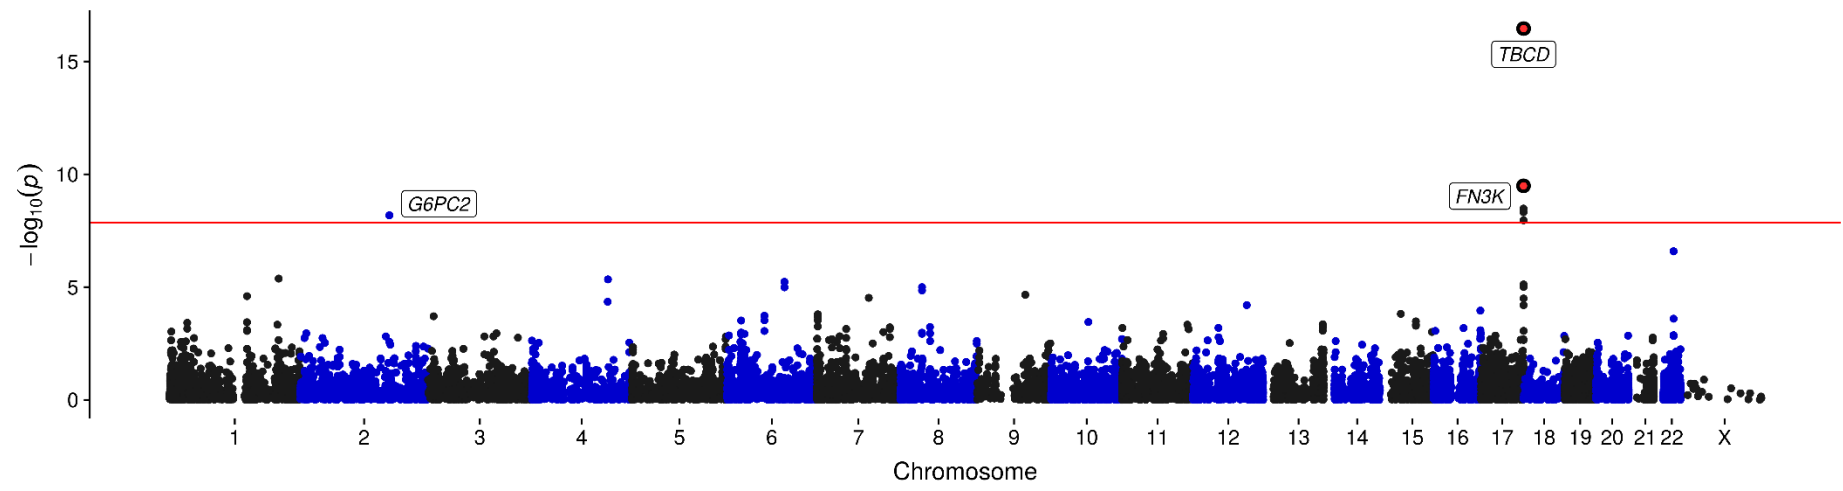

Type 2 diabetes

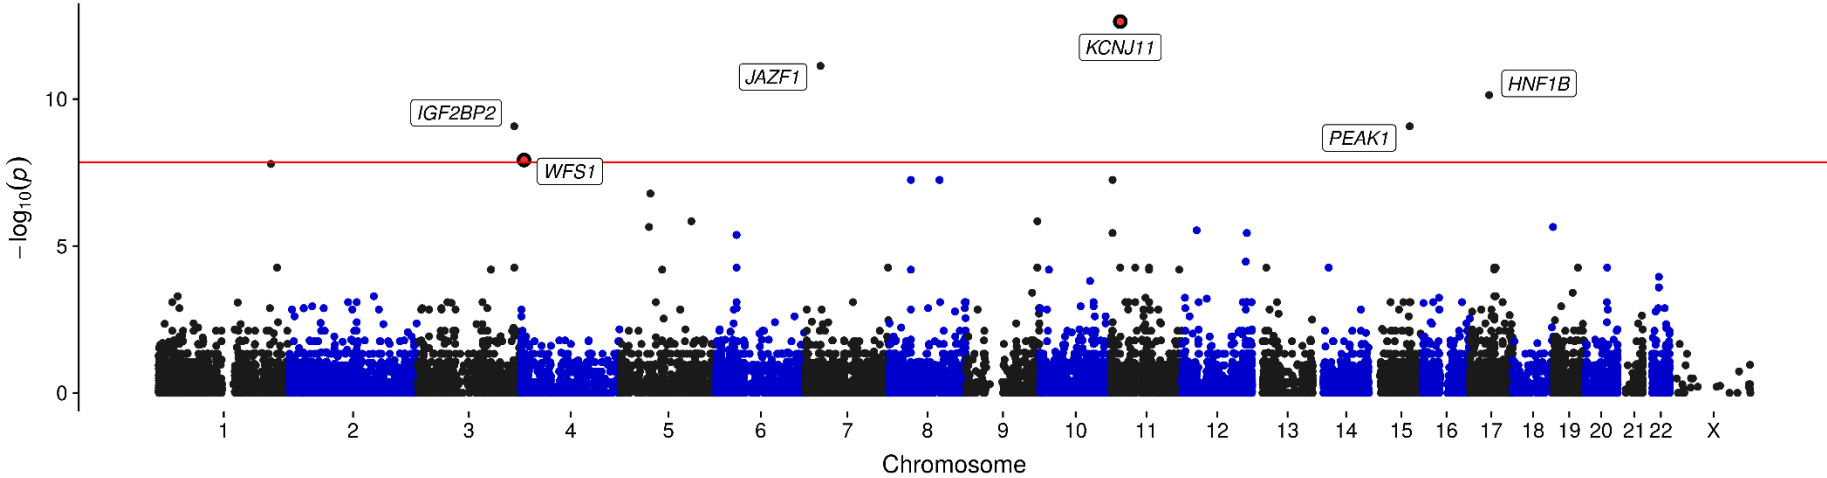

# Haematological

## Haemoglobin concentration

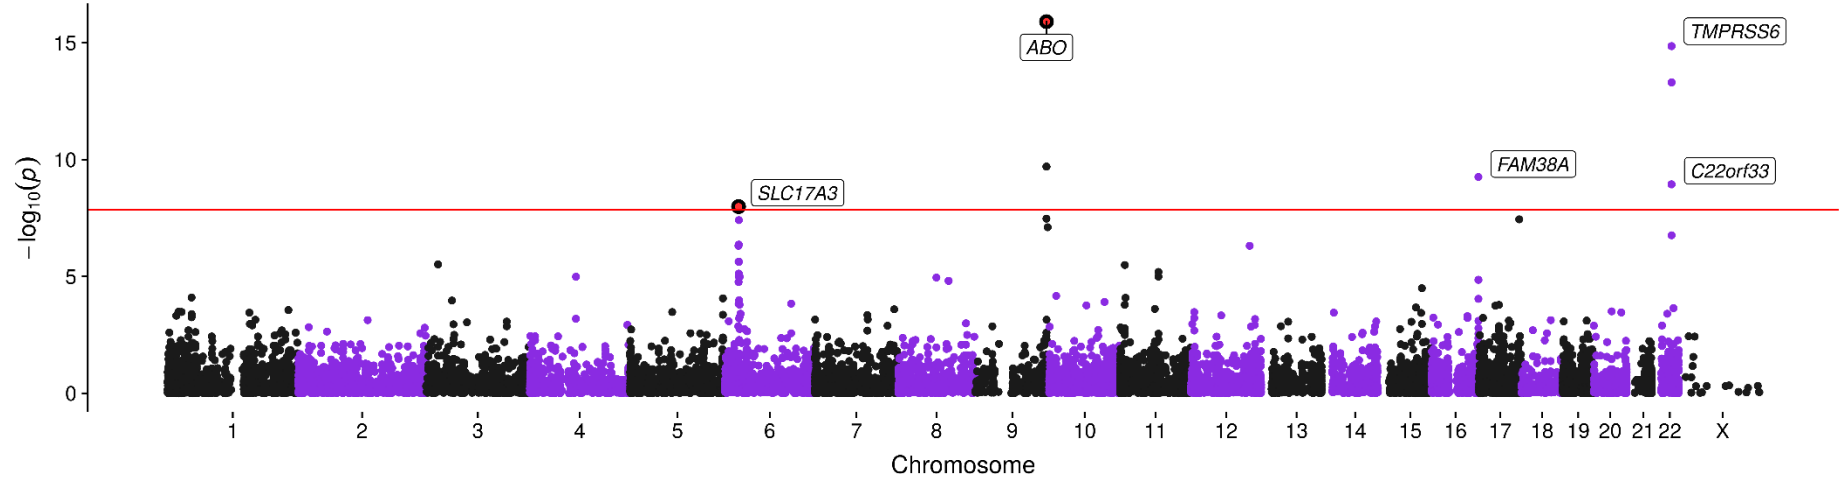

# Mean cell haemoglobin

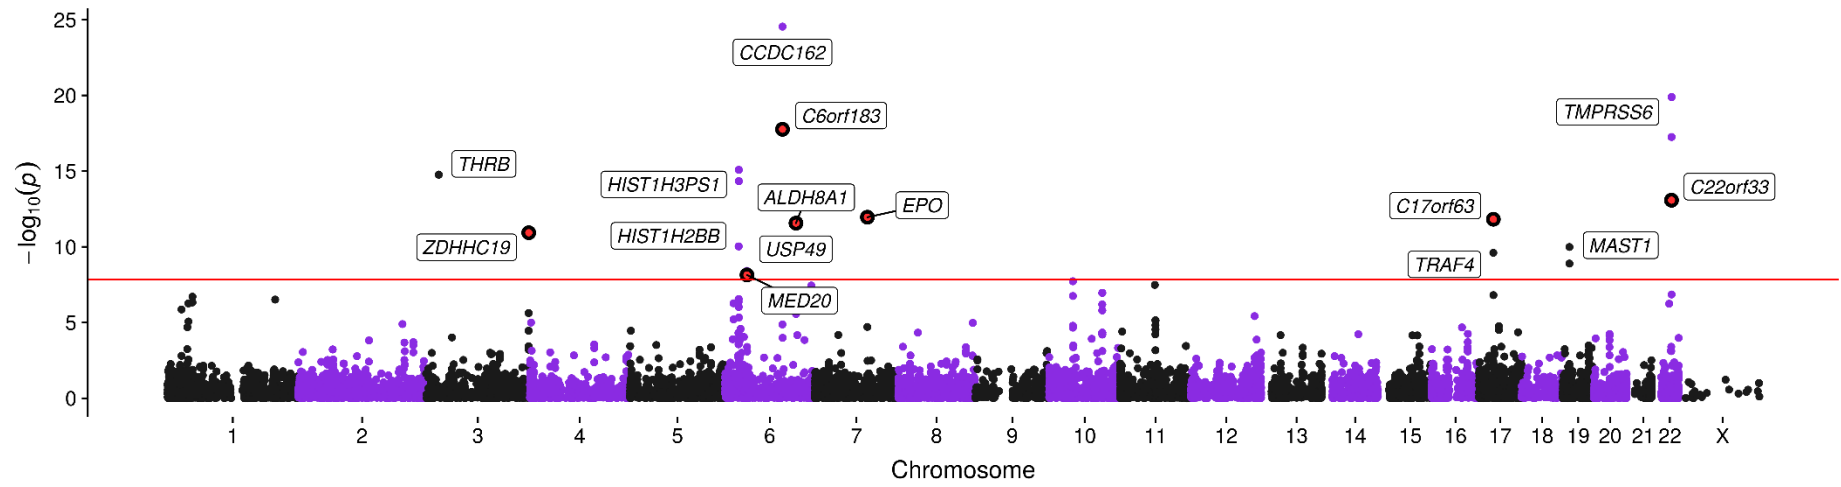

# Mean cell volume

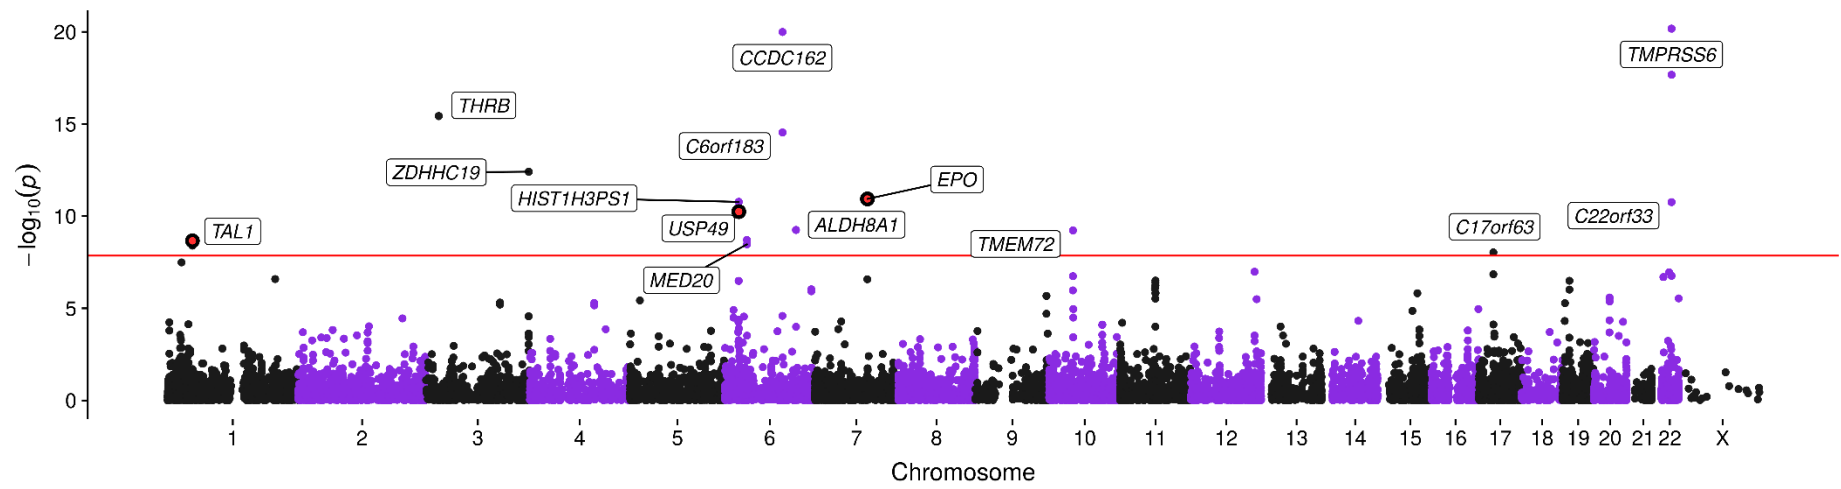

# Mean platelet volume

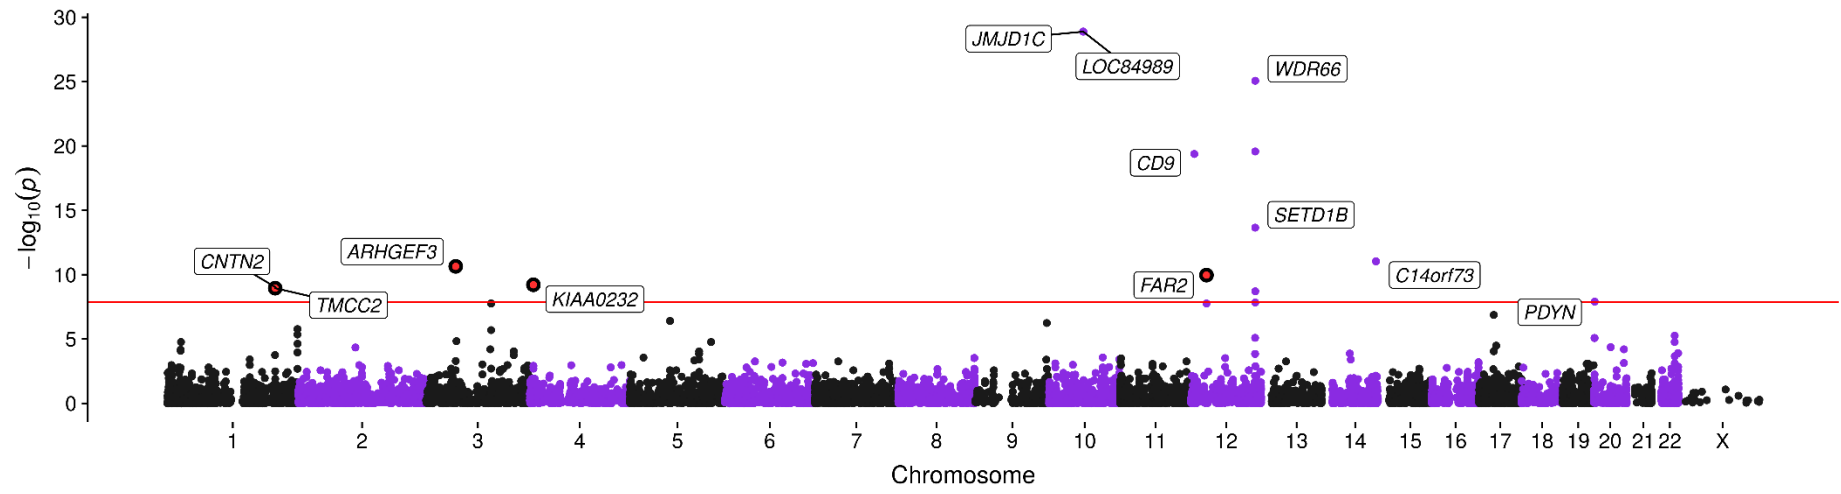



# Packed cell volume

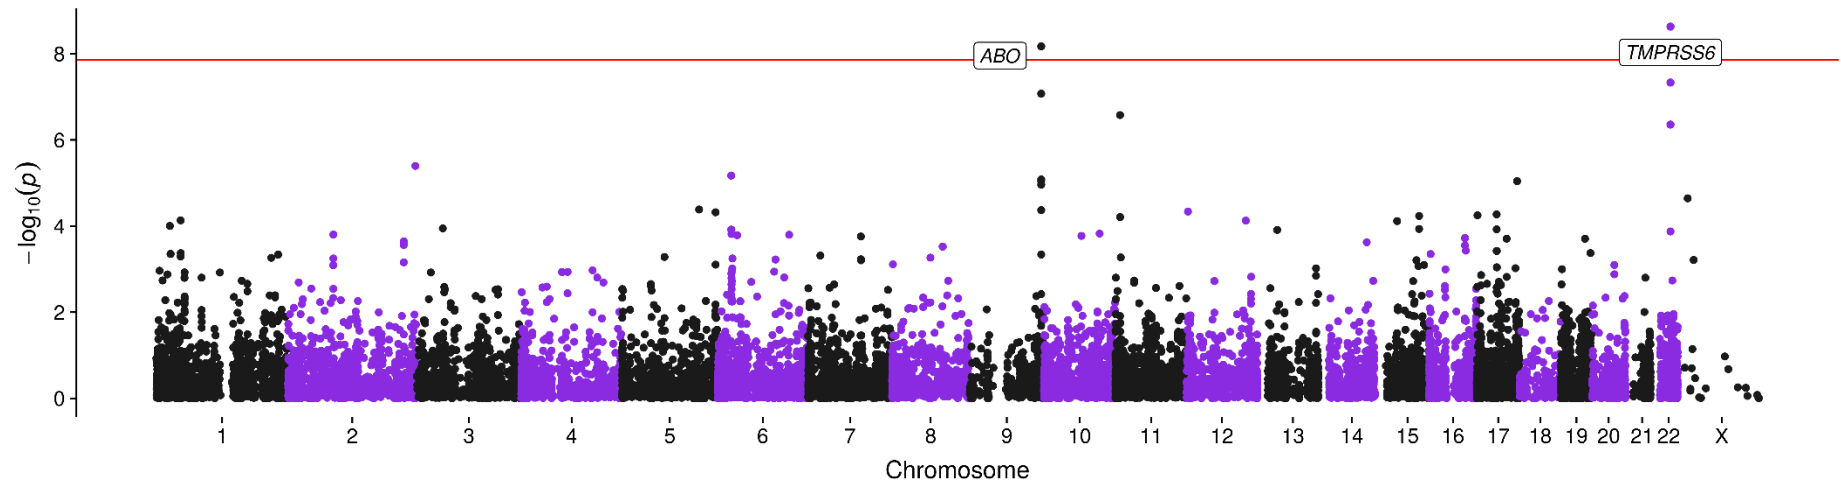

# Platelet count

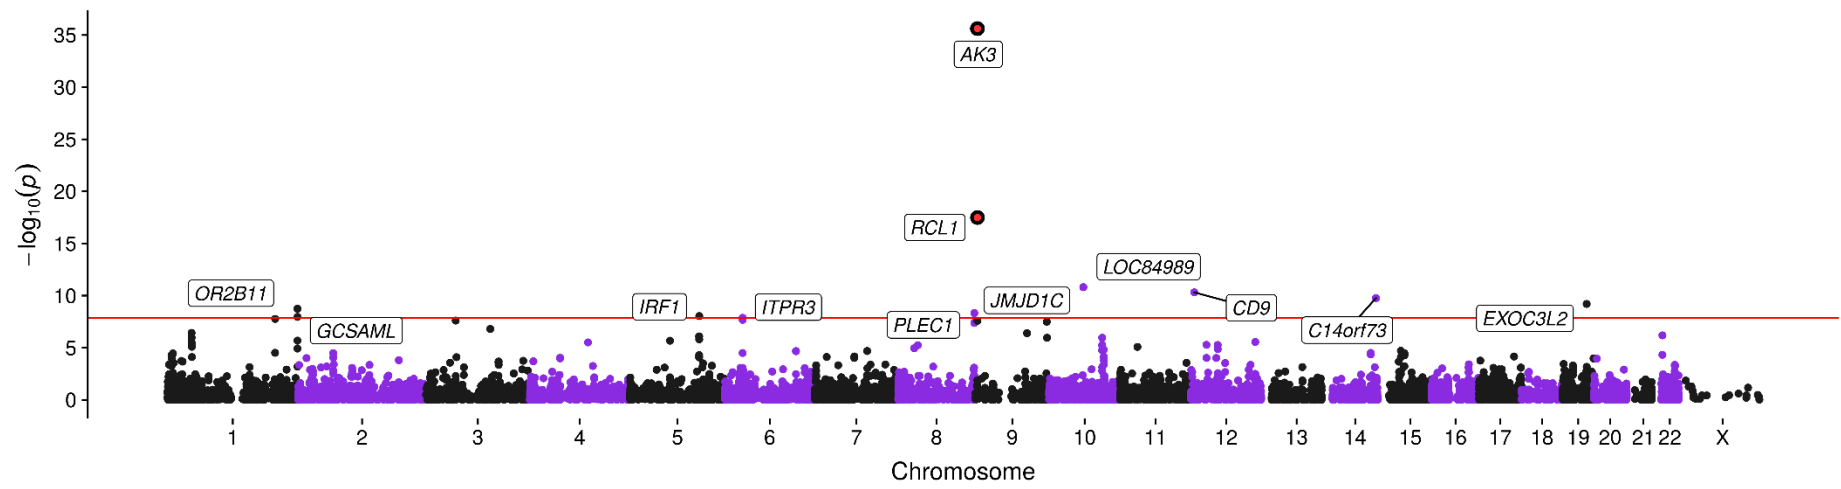

# Red blood cell count

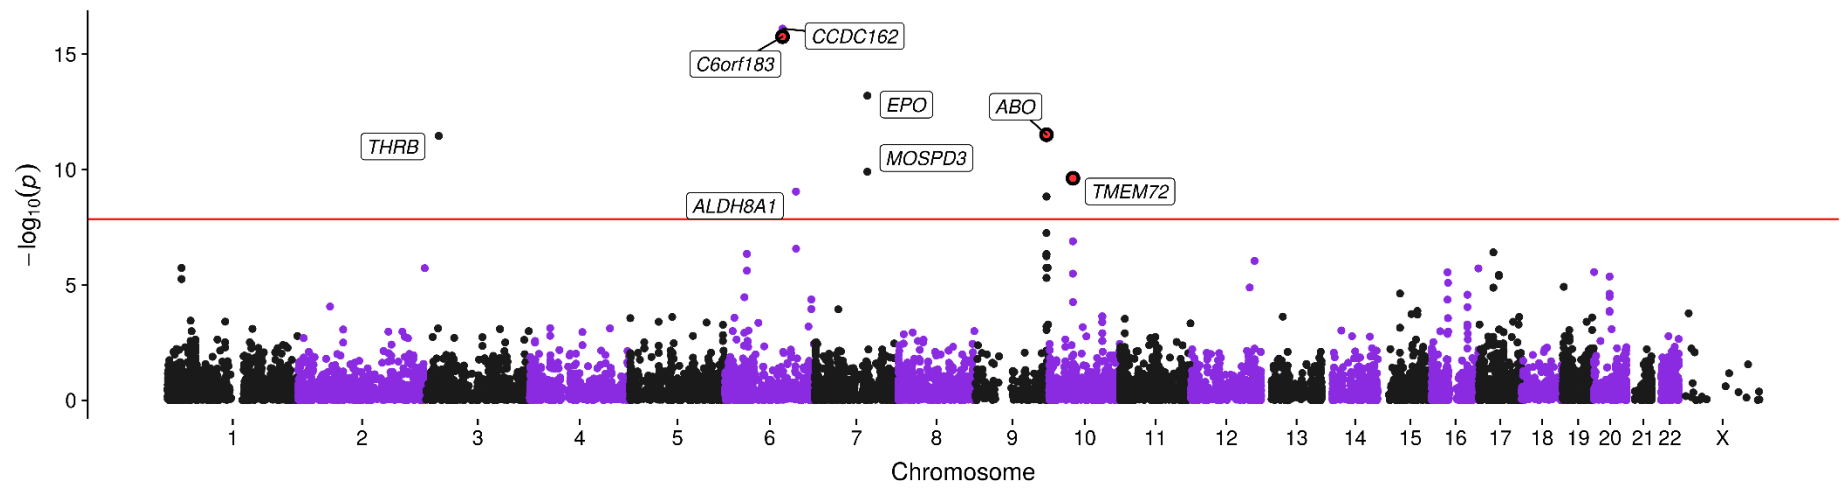

# Kidney

## Chronic kidney disease

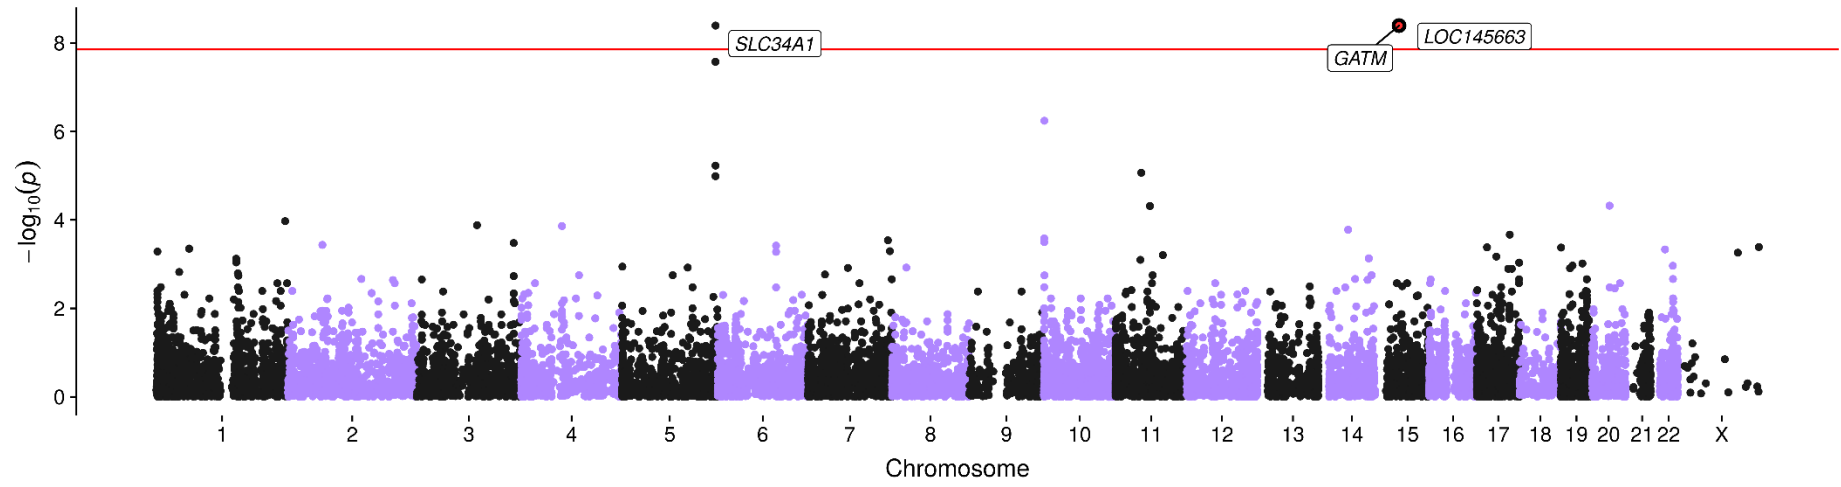

# Microalbuminuria

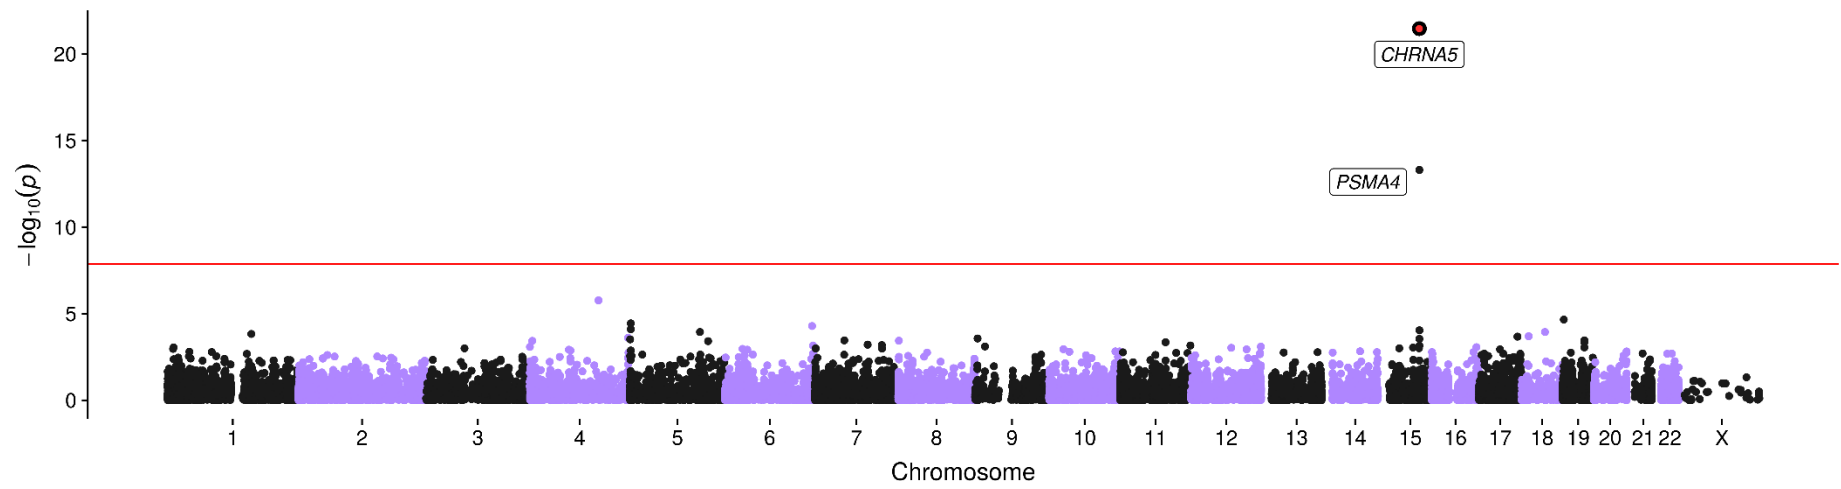

# Serum creatinine

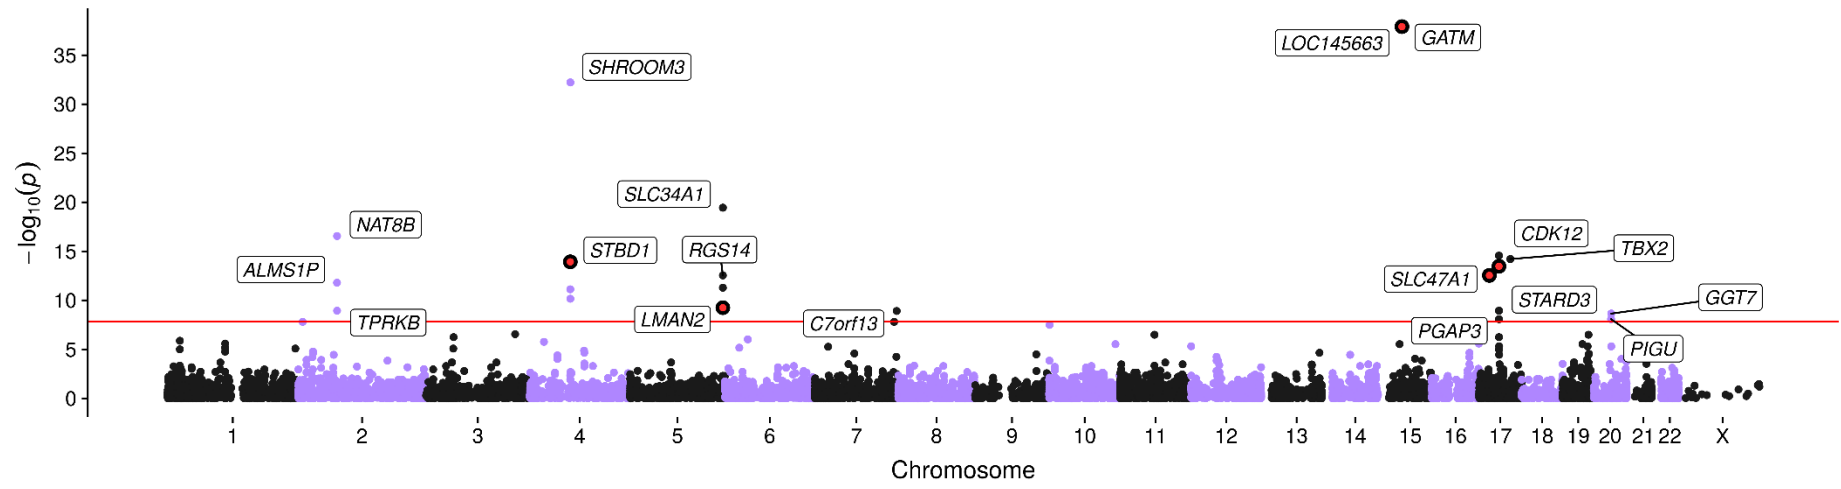

Serum cystatin C

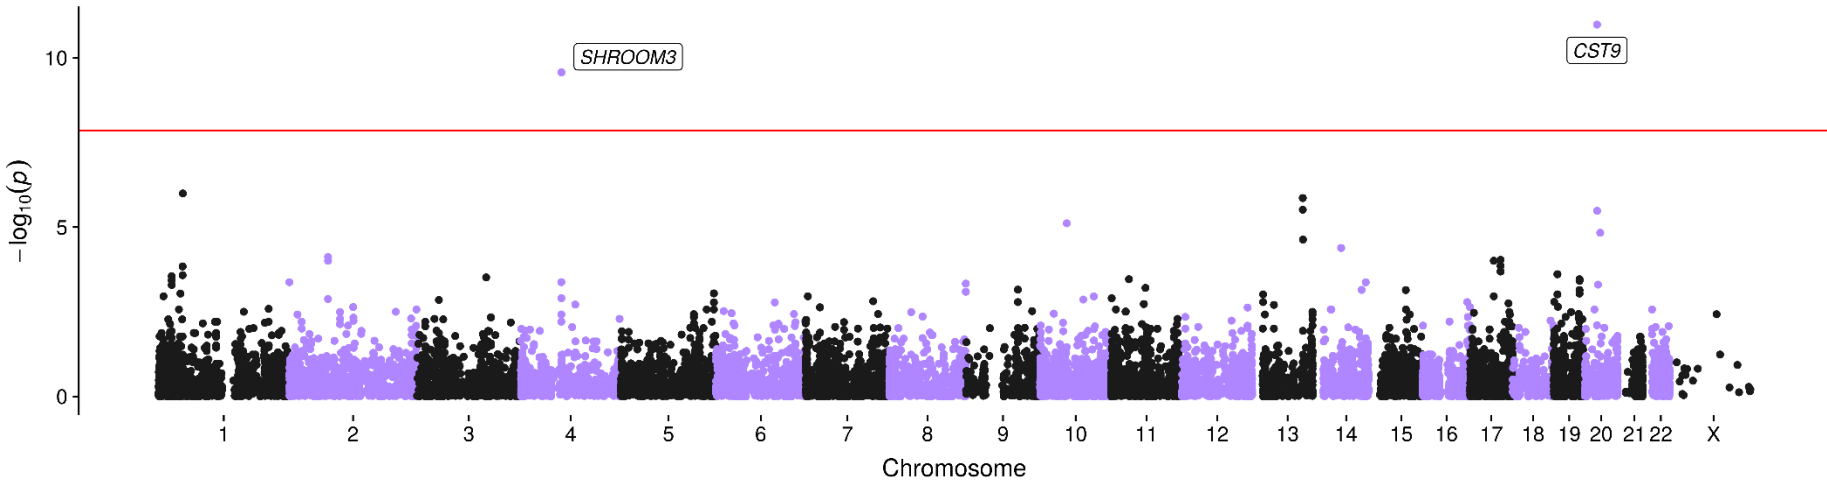

# Psychiatric / neurological

## Alzheimer's disease

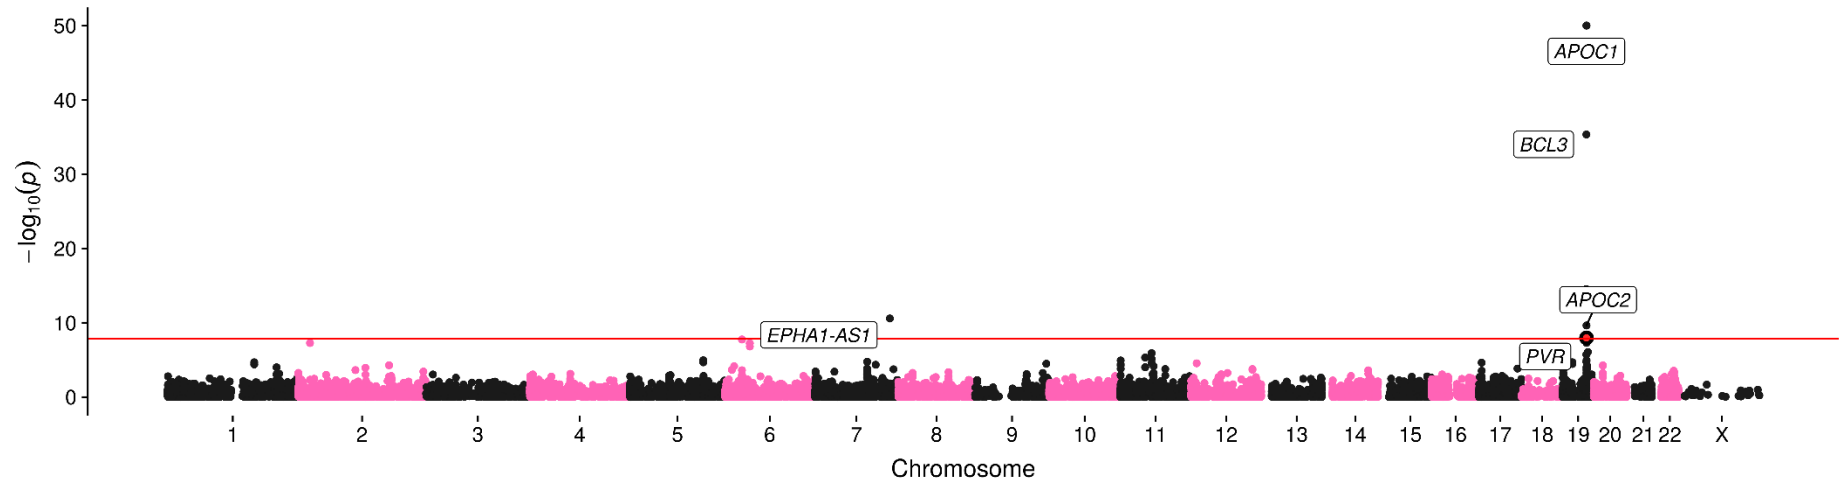



Anorexia nervosa

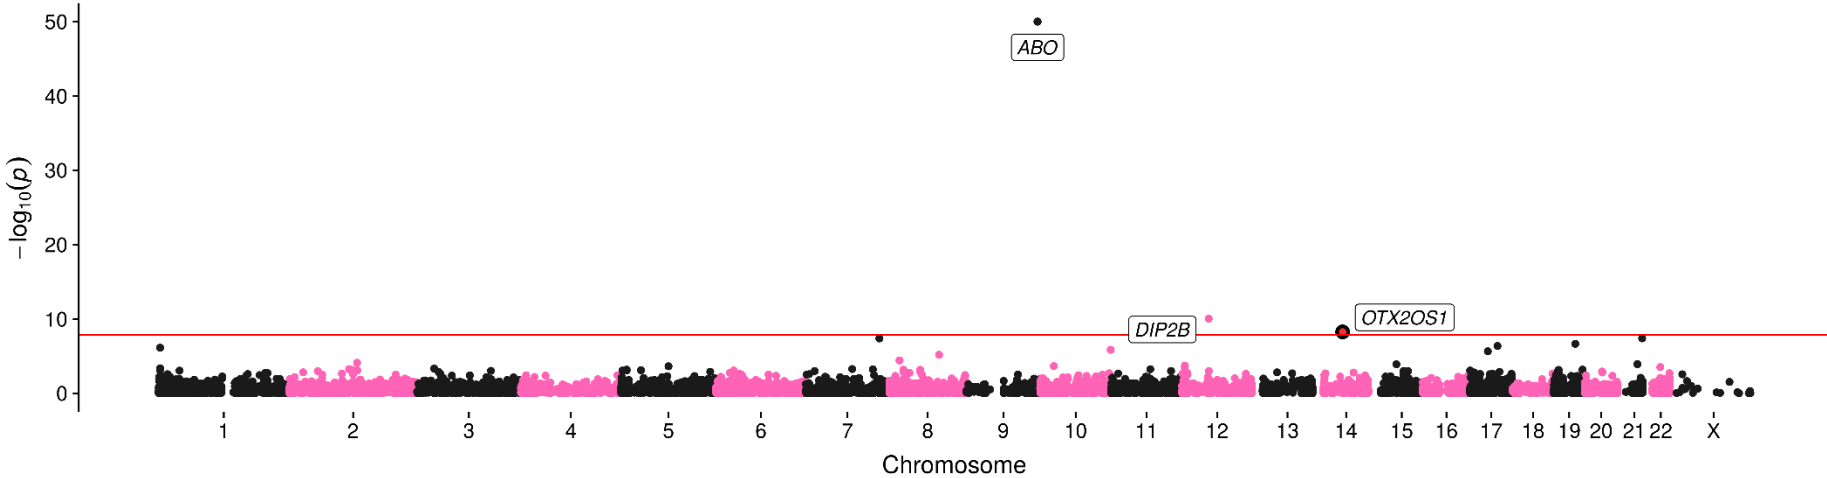

# Parkinson's disease

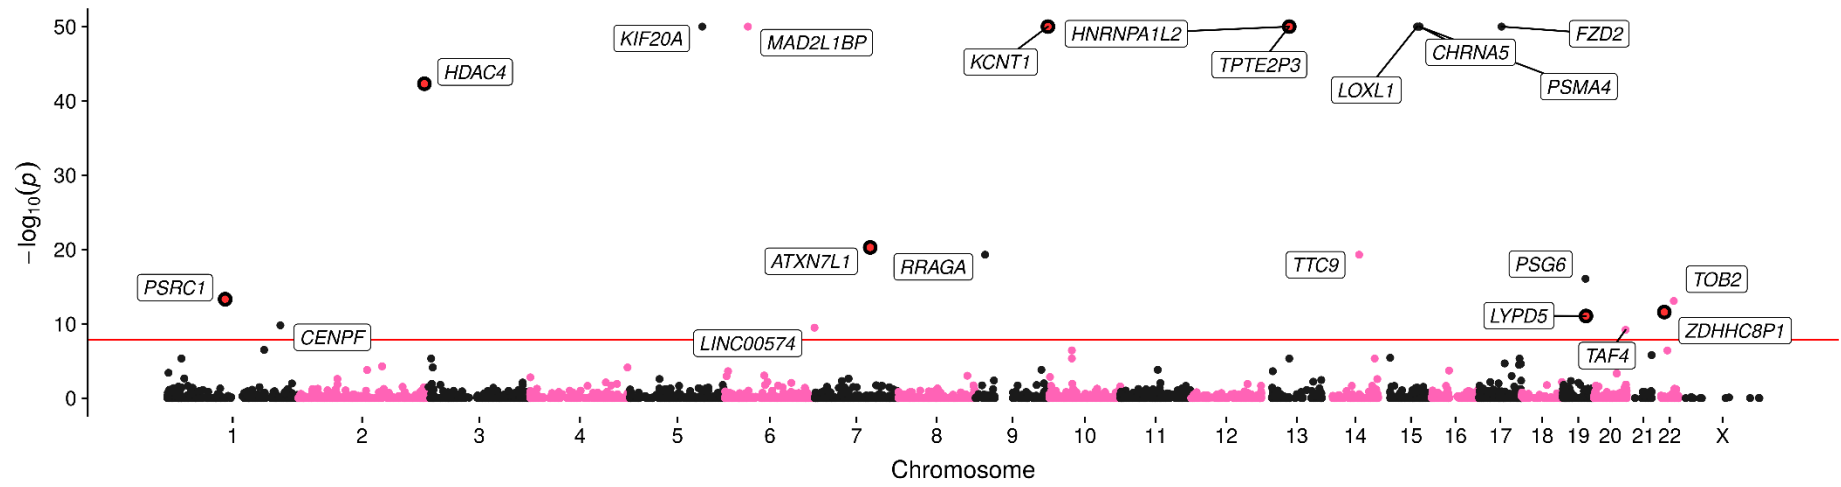

PGC cross-disorder traits

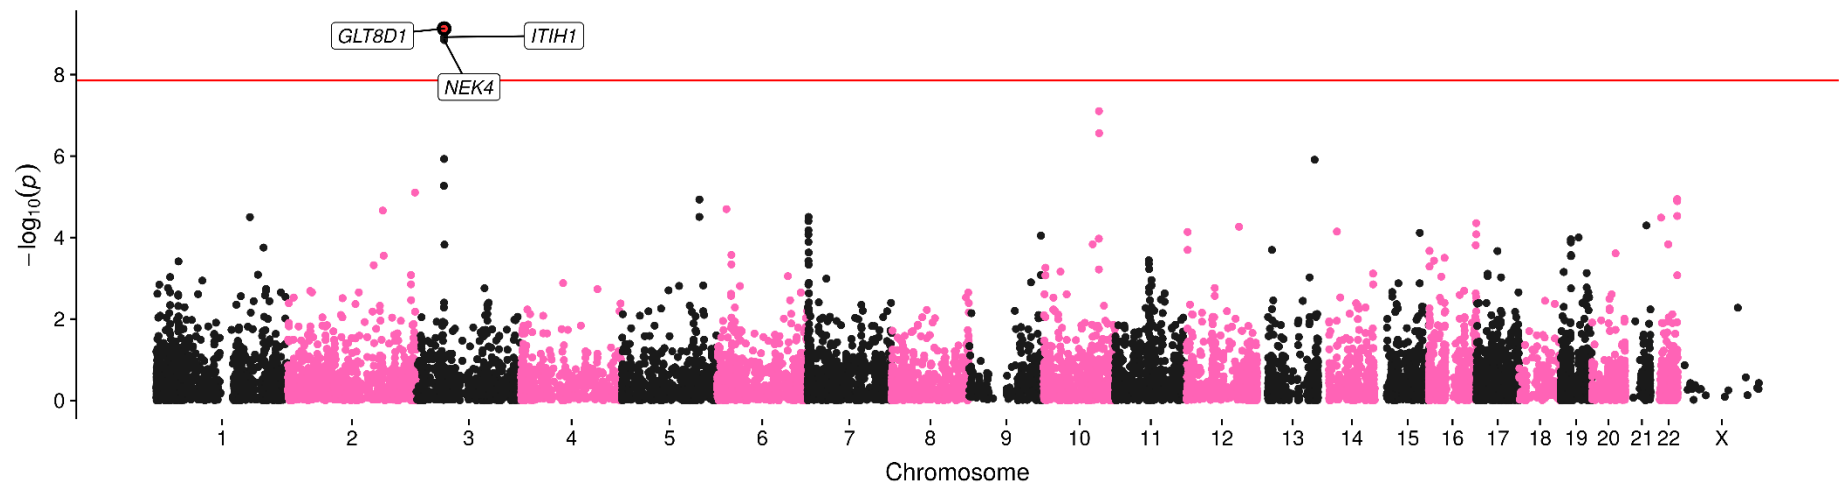

Putamen volume

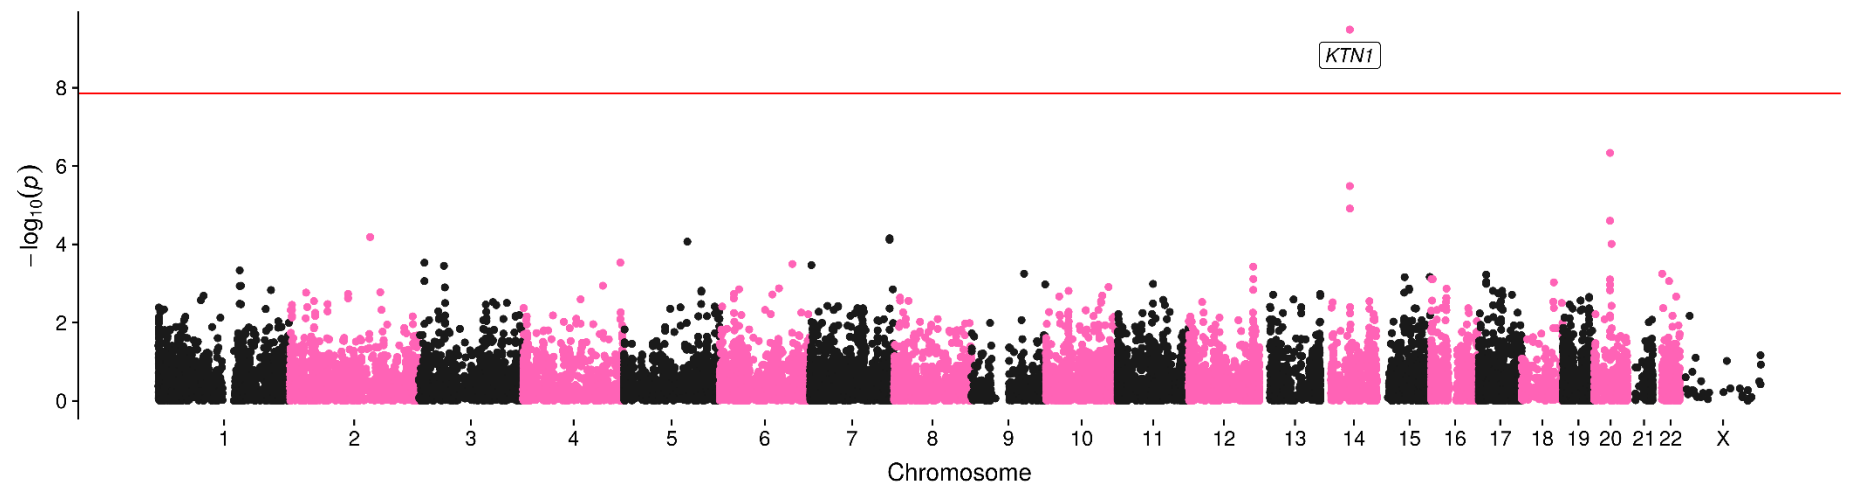

# Neuroticism

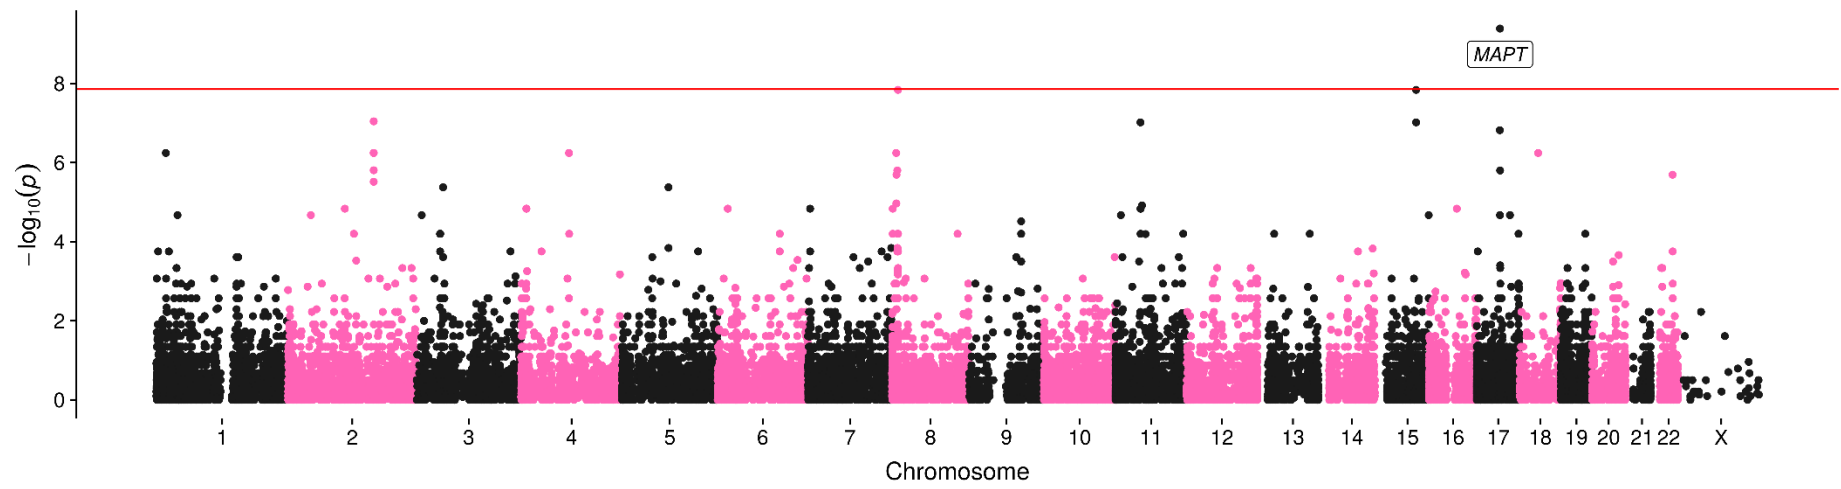

# Schizophrenia

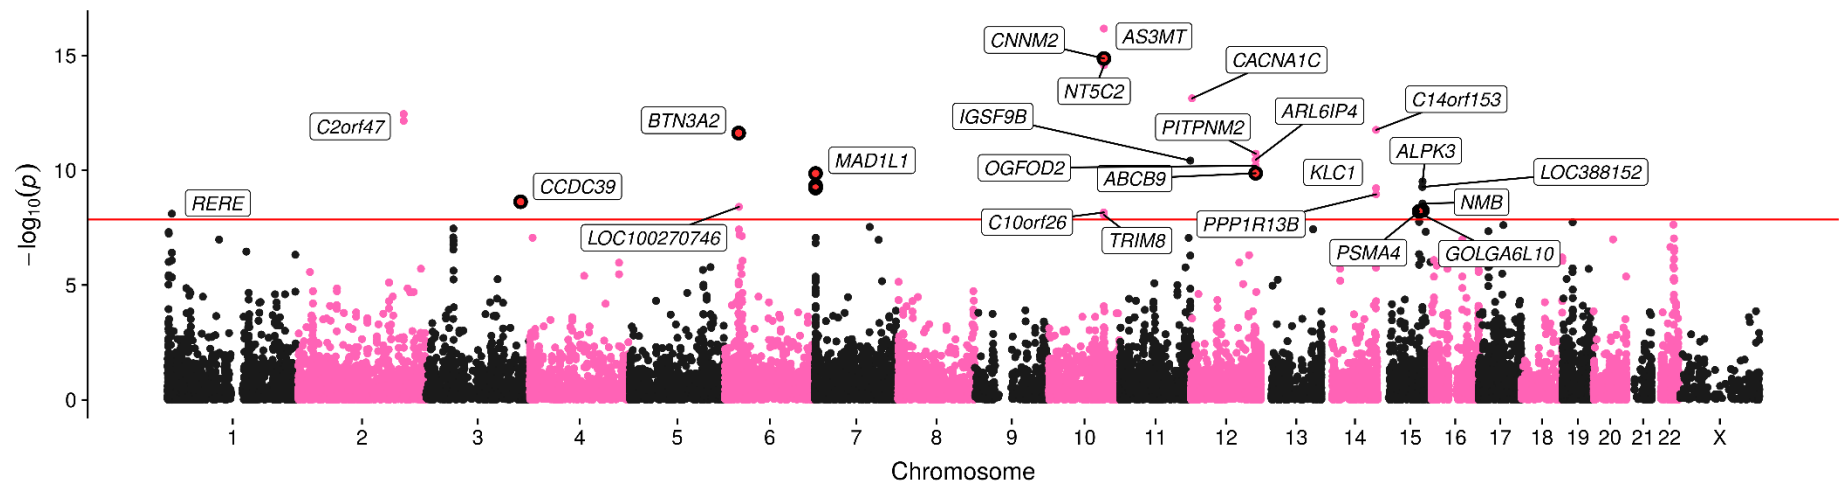

## Other

Cigarettes smoked per day

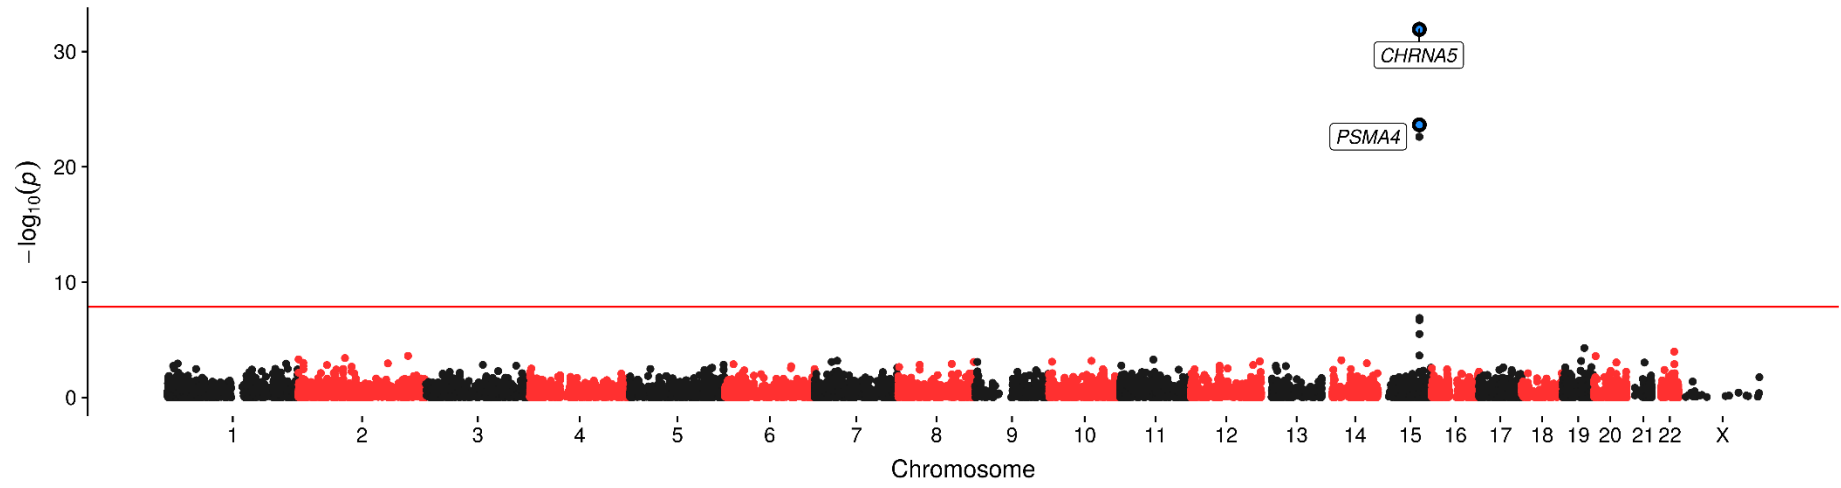

# Copper

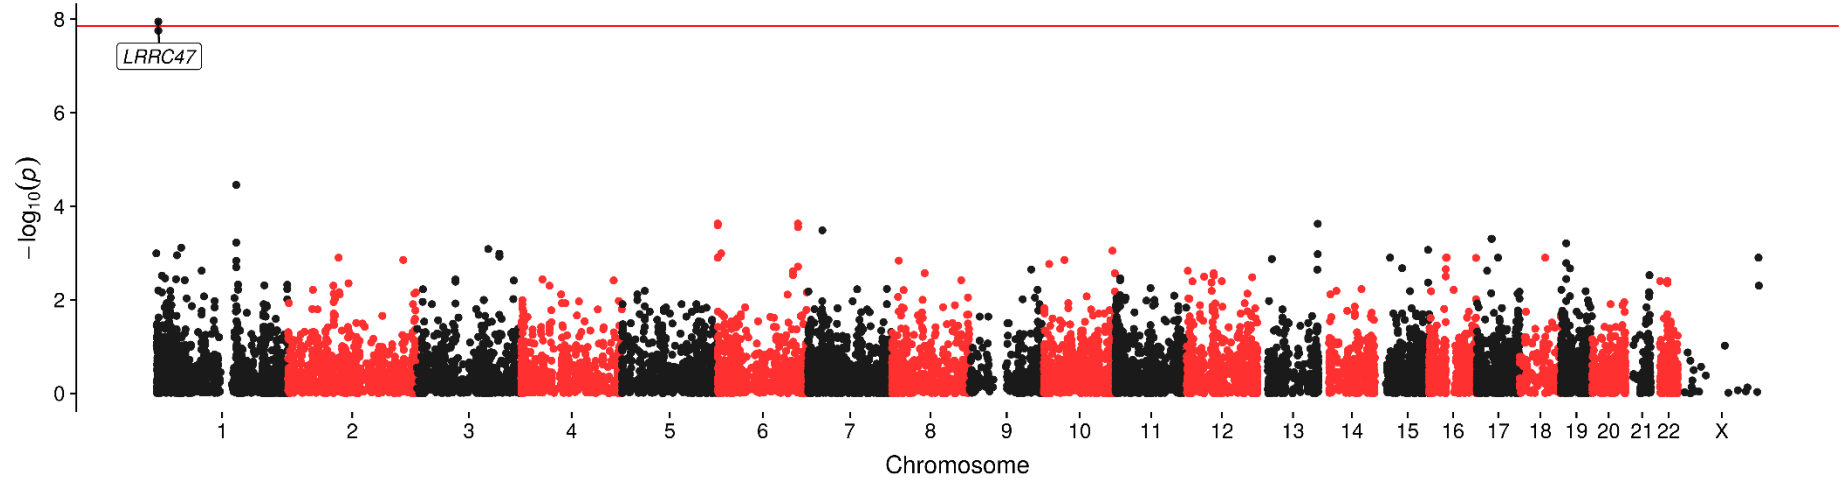



Iron

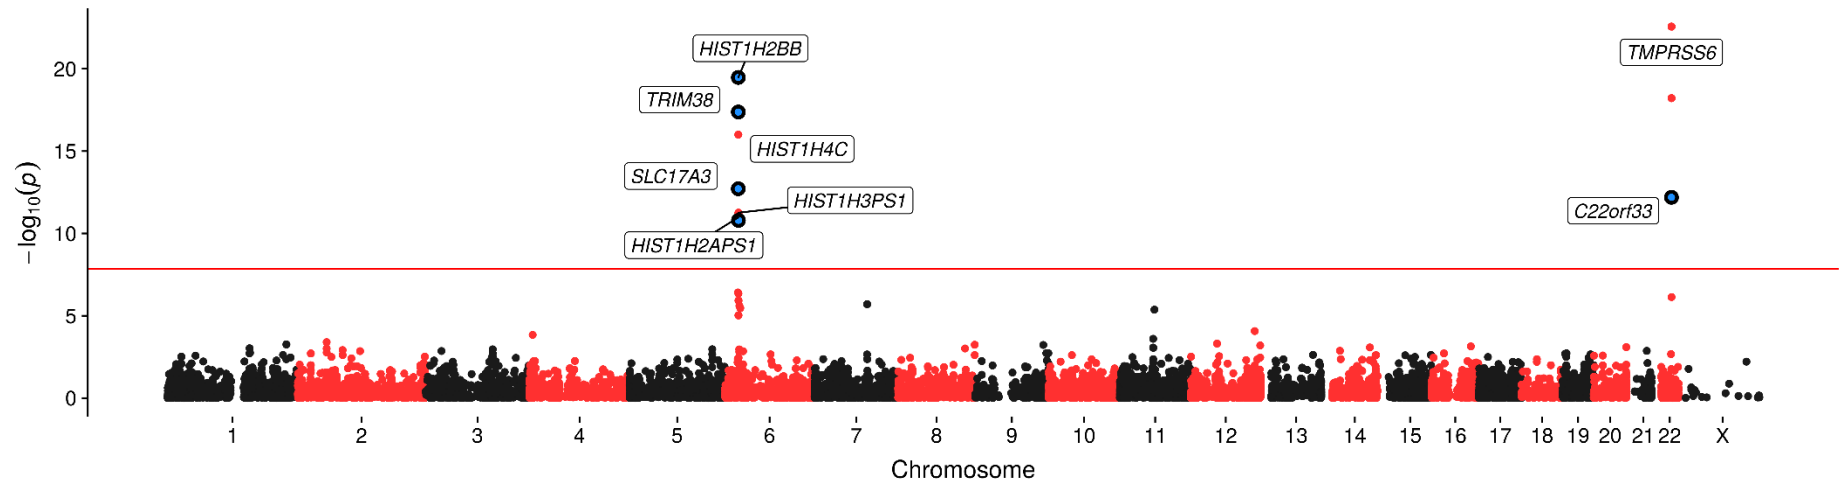

# Lung adenocarcinoma

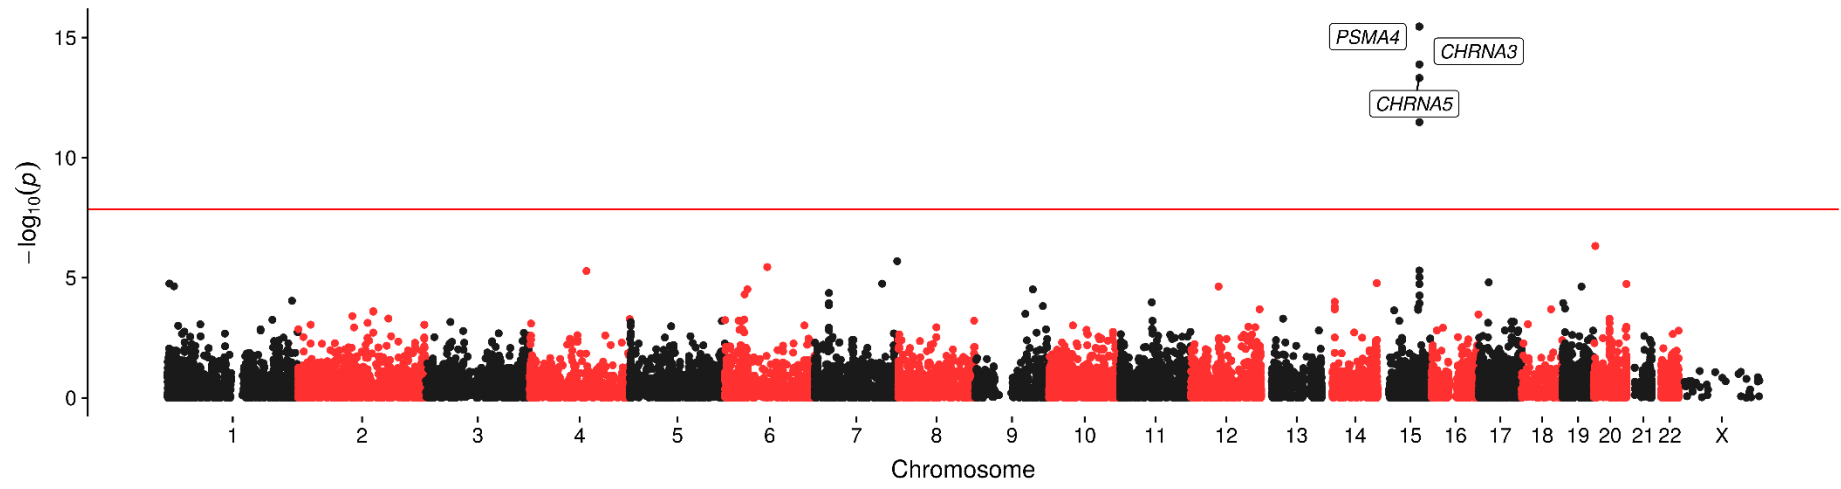

# Lung cancer

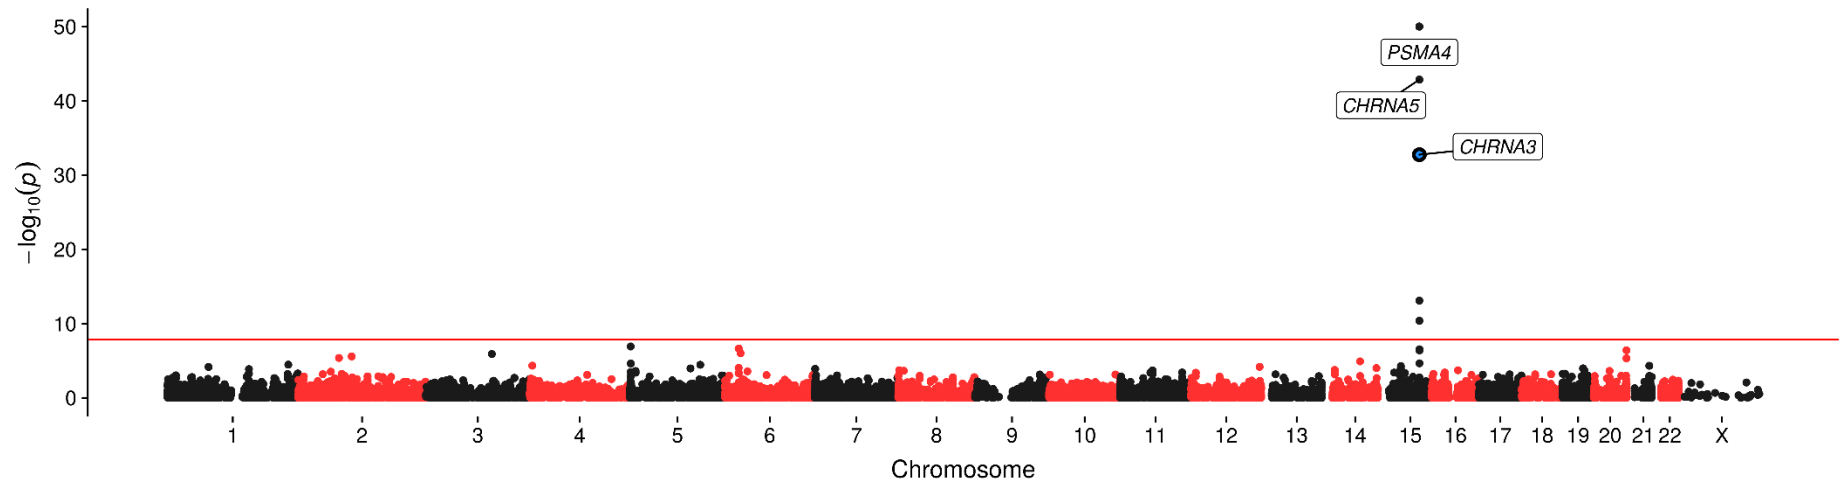

Squamous cell lung cancer

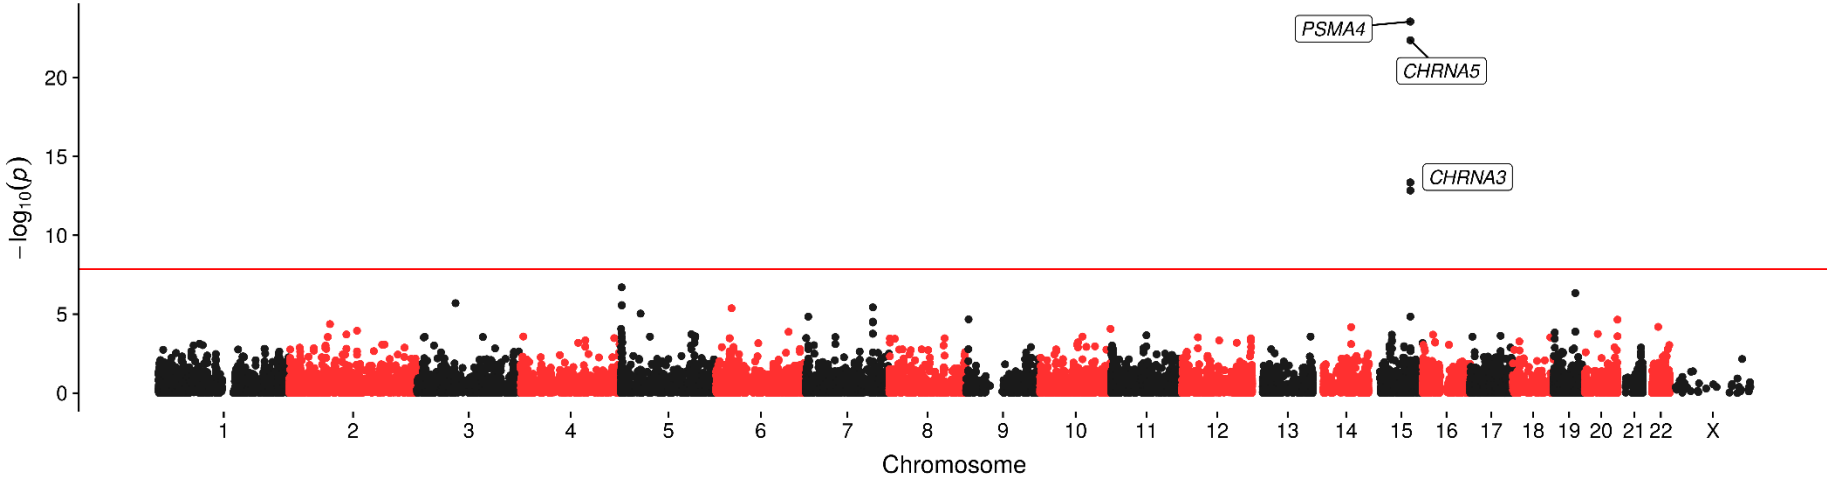

# Transferrin

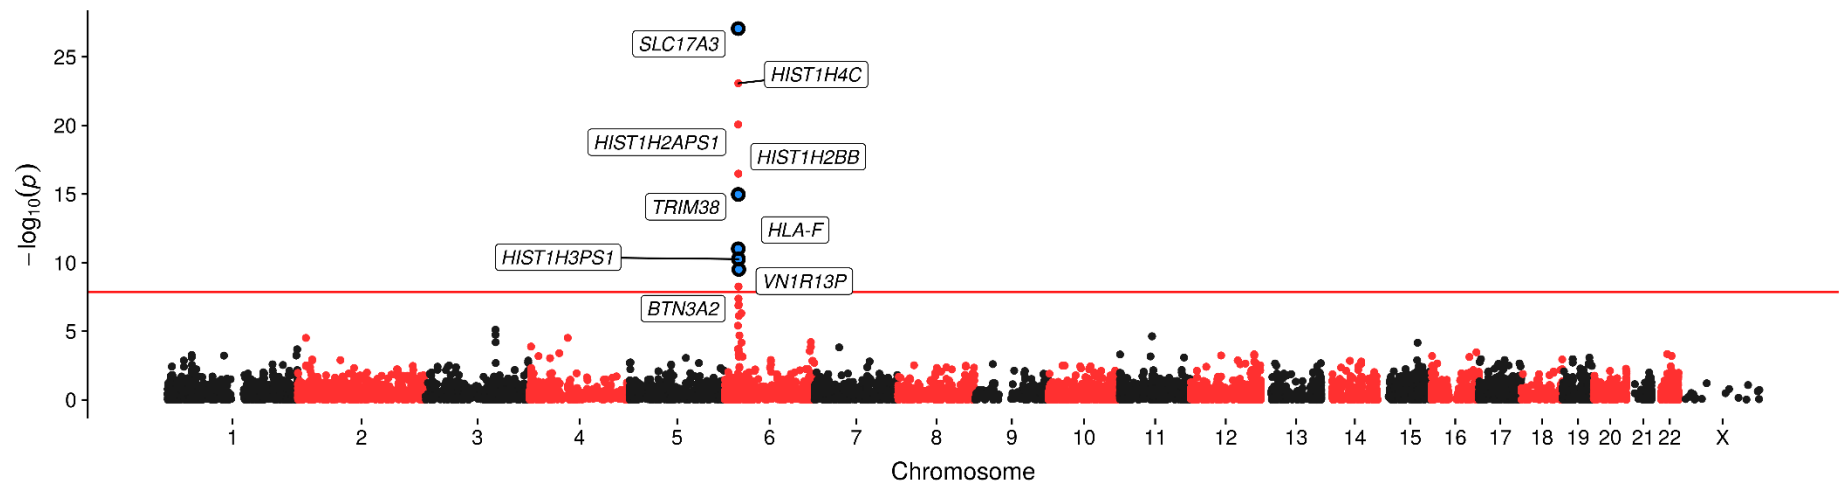

# Transferrin Saturation

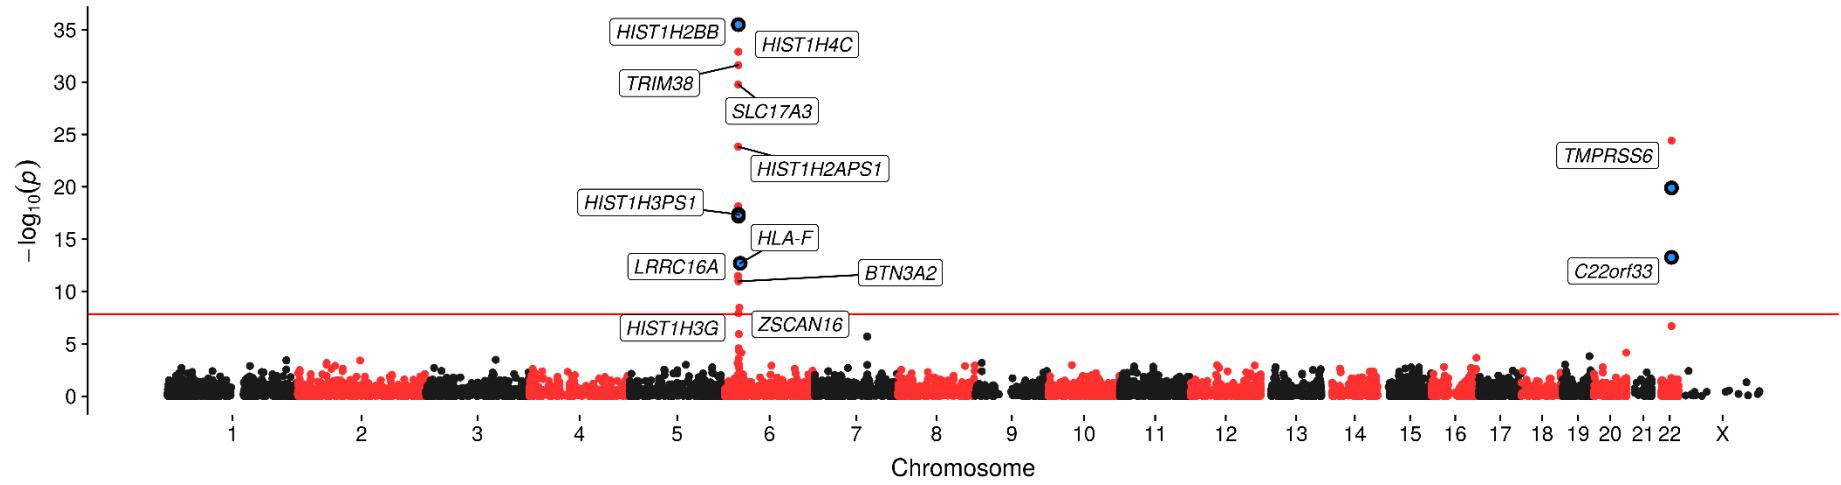

# Urate

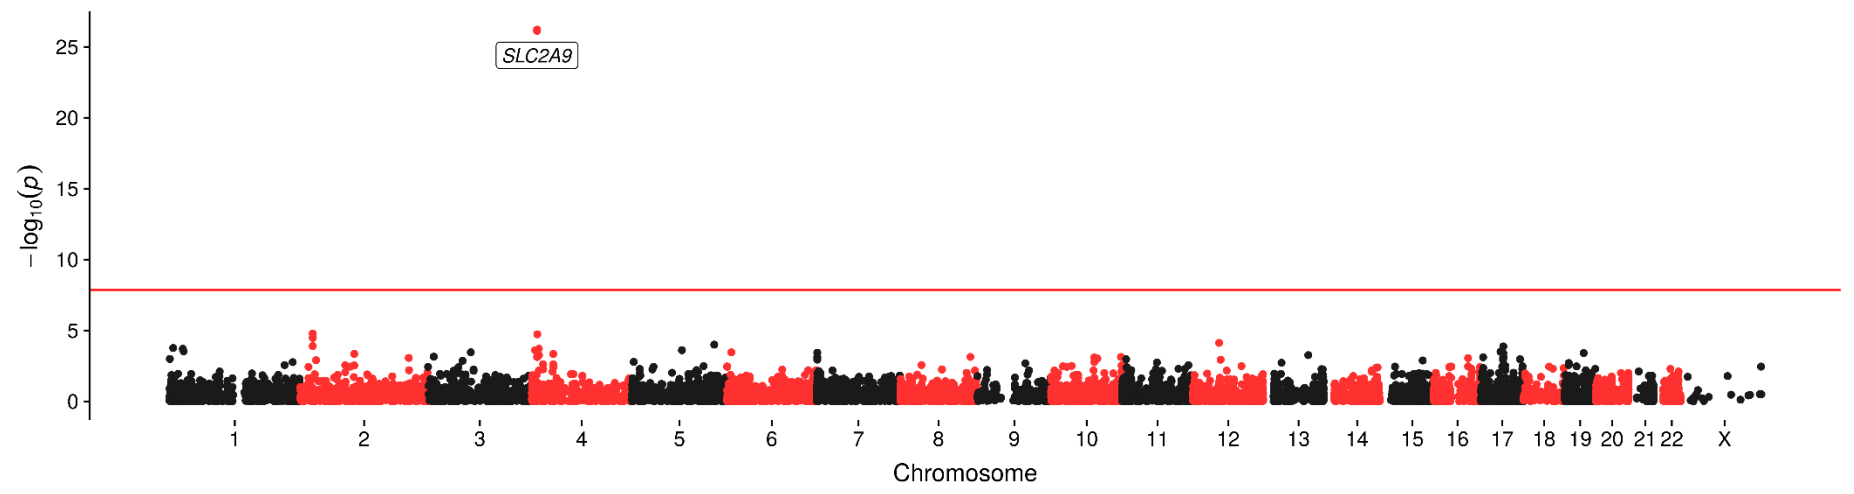

Supplement: Supplementary file [file 189076-3.pdf]
